# Supplementary material for: Phosphanyl-substituted tin half-sandwich complexes
Source: Royal Society of Chemistry journal article supplement (doi:10.1039/d3ra01384g), 2023-01-01
Supplement: d3ra01384g1.pdf [file d3ra01384g1.pdf]

## Supplementary Information

for

# Phosphanyl-substituted tin half-sandwich complexes

Carsten Müller<sup>a</sup>, Justin Schu<sup>a</sup>, Bernd Morgenstern<sup>a</sup>, Michael Zimmer<sup>a</sup>, Marc Schmidtmann<sup>b</sup>,  
André Schäfer<sup>\*a</sup>

<sup>a</sup>*Faculty of Natural Sciences and Technology, Department of Chemistry, Saarland University, 66123 Saarbrücken, Germany*

<sup>b</sup>*School of Mathematics and Science, Institute of Chemistry, Carl von Ossietzky University of Oldenburg, 26129 Oldenburg, Germany*

|                          |           |
|--------------------------|-----------|
| 1. Experimental Details  | S1 – S3   |
| 2. NMR Spectra           | S4 – S14  |
| 3. LIFDI-MS Spectra      | S15       |
| 4. XRD Data              | S16 – S20 |
| 5. Computational Details | S21 – S22 |
| 6. References            | S23       |

## 1. Experimental Details

All manipulations were carried out under an argon inert gas atmosphere (argon 5.0), using either standard Schlenk line techniques or a glovebox. Tin(II) chloride and trimethylsilyltriflate were purchased from abcr and used as received. Platinum(II) chloride and (1,5-cyclooctadiene)palladium(II) chloride were purchased from Carbolution and used as received. Silver tetrakis(perfluoro-*tert*-butoxy)aluminate was synthesized according to a literature procedure.<sup>1</sup> Diphosphanylstannocene, **dippSn**, was prepared as reported before.<sup>2</sup>

NMR-spectra were recorded on Bruker Avance III 300 (solution), Bruker Avance III 400 (solution) and Bruker Ascend 400WB (solid state) spectrometers. <sup>1</sup>H and <sup>13</sup>C NMR spectra were referenced using the solvent signals<sup>3</sup> and <sup>19</sup>F, <sup>31</sup>P NMR and <sup>119</sup>Sn NMR spectra were referenced using external standards ( $\delta$  <sup>19</sup>F (CFCl<sub>3</sub>) = 0;  $\delta$  <sup>27</sup>Al (1.1 M Al(NO<sub>3</sub>)<sub>3</sub> in D<sub>2</sub>O) = 0;  $\delta$  <sup>31</sup>P (85% H<sub>3</sub>PO<sub>4</sub> in H<sub>2</sub>O) = 0;  $\delta$  <sup>119</sup>Sn (SnMe<sub>4</sub>) = 0).

Elemental analysis were performed with a Elementar vario micro cube.

HRMS measurements were recorded on a Q-TOF Premiere instrument from Waters, Manchester, England, in LIFDI(+) mode, by Linden CMS, Weyhe, Germany.

Single crystal X-ray diffraction analysis were carried out on a Bruker AXS X8 Apex CCD diffractometer and a Bruker D8 Venture diffractometer with a microfocus sealed tube and a Photon II detector operating with graphite monochromated Mo K $\alpha$  radiation. Data were corrected for absorption effects using the multi-scan method. Structure solution was conducted with direct methods using SHELXT and refinement by full matrix least squares calculations on F<sup>2</sup> using SHELXL2018 in the graphical user interface SHELXLE.<sup>4</sup>

### Synthesis of (diisopropylphosphanyl)cyclopentadienyltin(II) chloride **1a**

1,1'-bis(diisopropylphosphanyl)cyclopentadienyltin, **dippSn**, (3.24 g; 6.73 mmol) and tin(II) chloride (1.28 g; 6.73 mmol) were mixed and ~100 mL of thf were added. The mixture was stirred overnight. Afterwards the solvent was removed in *vacuo* and the light yellow residue was washed with 250 mL hexane and dried in *vacuo* to obtain **1a** as a colorless solid.

Yield: 4.00 g; 88%.

<sup>1</sup>H-NMR (400.13 MHz, 298 K, CD<sub>2</sub>Cl<sub>2</sub>):  $\delta$  = 6.33 (d, 2H,  $J_{\text{HH}}$  = 2.3 Hz, CpH), 6.14 (d, 2H,  $J_{\text{HH}}$  = 2.0 Hz, CpH), 2.35 (sept, 2H,  $J_{\text{HH}}$  = 6.7 Hz, CH), 1.21 (d, 3H,  $J_{\text{HH}}$  = 7.1 Hz, CH<sub>3</sub>), 1.17 (d, 3H,  $J_{\text{HH}}$  = 7.1 Hz, CH<sub>3</sub>), 1.11 (d, 3H,  $J_{\text{HH}}$  = 6.9 Hz, CH<sub>3</sub>), 1.08 (d, 3H,  $J_{\text{HH}}$  = 6.8 Hz, CH<sub>3</sub>).

<sup>13</sup>C{<sup>1</sup>H}-NMR (100.62 MHz, 298 K, CD<sub>2</sub>Cl<sub>2</sub>):  $\delta$  = 118.6 (d,  $J_{\text{CP}}$  = 10 Hz, CpC), 113.7 (d,  $J_{\text{CP}}$  = 6.3 Hz, CpC), 24.3 (d,  $J_{\text{CP}}$  = 4.7 Hz, CH), 19.5 (bs, CH<sub>3</sub>).

<sup>13</sup>C{<sup>1</sup>H}-CP-MAS(13 kHz)-NMR (100.67 MHz, 298 K):  $\delta$  = 120.6, 115.9, 107.1, 100.0, 24.1, 22.3, 20.8, 18.9, 16.4.

<sup>31</sup>P{<sup>1</sup>H}-NMR (161.98 MHz, 298 K, CD<sub>2</sub>Cl<sub>2</sub>):  $\delta$  = 3.6.

<sup>31</sup>P{<sup>1</sup>H}-CP-MAS(13 kHz)-NMR (162.04 MHz, 298 K):  $\delta$  = 4.3 ( $^1J_{\text{PSn}}$  = 950 Hz).

<sup>119</sup>Sn{<sup>1</sup>H}-CP-MAS(13 kHz)-NMR (149.17 MHz, 298 K):  $\delta$  = -709.

LIFDI-MS:  $m/z$  = 635.00 (C<sub>22</sub>H<sub>36</sub>ClP<sub>2</sub>Sn<sup>+</sup>), 335.98 (C<sub>11</sub>H<sub>18</sub>ClPSn<sup>+</sup>).

### Synthesis of (diisopropylphosphanyl)cyclopentadienyltin(II) triflate **1b**

**1a** (1.00 g; 2.98 mmol) was suspended in 50 mL *o*-difluorobenzene and trimethylsilyltriflate (663 mg; 2.98 mmol) was added. After stirring the mixture at 343 K overnight, the solvent was removed in *vacuo* and the residue was taken up in 20 mL dichloromethane. To this solution, 40 mL hexane was added, and the solution was stored at 253 K overnight yielding colorless crystals of **1b**.

Yield: 400 mg; 30%.

$^1\text{H-NMR}$  (400.13 MHz, 298 K,  $\text{CD}_2\text{Cl}_2$ ):  $\delta$  = 6.76 (s, 2H, CpH), 6.46-6.43 (m, 2H, CpH), 2.74 (oct, 2H,  $J_{\text{HH}} = 7.1$  Hz, CH), 1.31 (d, 3H,  $J_{\text{HH}} = 7.1$  Hz,  $\text{CH}_3$ ), 1.28-1.24 (m, 6H,  $\text{CH}_3$ ), 1.22 (d, 3H,  $J_{\text{HH}} = 7.1$  Hz,  $\text{CH}_3$ ).

$^{13}\text{C}\{^1\text{H}\}$ -NMR (75.48 MHz, 298 K,  $\text{CD}_2\text{Cl}_2$ ):  $\delta$  = 120.2 (q,  $J_{\text{CF}} = \text{CF}_3$ ), 118.7 (d,  $J_{\text{CP}} = 8.1$  Hz, CpC), 112.9 (bs, CpC), 24.8 (d,  $J_{\text{CP}} = 8.9$  Hz, CH), 19.3 (s,  $\text{CH}_3$ ), 19.0 (d,  $J_{\text{CP}} = 5.6$  Hz,  $\text{CH}_3$ ).

$^{19}\text{F}\{^1\text{H}\}$ -NMR (282.38 MHz, 298 K,  $\text{CD}_2\text{Cl}_2$ ):  $\delta$  = -78.3.

$^{31}\text{P}\{^1\text{H}\}$ -NMR (161.98 MHz, 298 K,  $\text{CD}_2\text{Cl}_2$ ):  $\delta$  = 19.8.

$^{31}\text{P}\{^1\text{H}\}$ -CP-MAS(13 kHz)-NMR (162.04 MHz, 298 K):  $\delta$  = 19.2 ( $^1J_{\text{PSn}} = 1460$  Hz).

$^{119}\text{Sn}\{^1\text{H}\}$ -CP-MAS(13 kHz)-NMR (149.17 MHz, 298 K):  $\delta$  = -928.

Elemental analysis: calculated for  $\text{C}_{12}\text{H}_{18}\text{F}_3\text{O}_3\text{PSSn}$ : C: 32.10%, H: 4.04%, S: 7.14%; found: C: 32.20%, H: 4.17%, S: 6.86%.

### Synthesis of palladium complex **2a**

(1,5-cyclooctadiene)palladium(II) chloride (213 mg; 0.75 mmol) and **1a** (500 mg; 1.49 mmol) were mixed in 50 mL thf and stirred overnight. The yellow solution was reduced to approximately half of its volume and the same amount of hexane was added. The resulting solution was stored at 253 K to obtain **2a** in the form of red crystals.

Yield: 312 mg; 25%.

$^1\text{H-NMR}$  (400.13 MHz, 298 K,  $\text{CD}_2\text{Cl}_2$ ):  $\delta$  = 6.70 (s, 2H, CpH), 6.25-5.75 (br, 3H, CpH), 2.77-2.65 (m, 2H, CH), 1.45-1.26 (m, 6H,  $\text{CH}_3$ ), 1.16-1.01 (m, 6H,  $\text{CH}_3$ ).

$^{13}\text{C}\{^1\text{H}\}$ -NMR (100.62 MHz, 298 K,  $\text{CD}_2\text{Cl}_2$ ):  $\delta$  = 141.1 (s, CpC), 136.6 (s, CpC), 132.5 (bs, CpC), 129.7 (s, CpC), 71.1 (s, CpC), 27.0 (s, CH), 20.3-18.3 (m,  $\text{CH}_3$ ).

$^{31}\text{P}\{^1\text{H}\}$ -NMR (161.98 MHz, 298 K,  $\text{CD}_2\text{Cl}_2$ ):  $\delta$  = 41.7 ( $^2J_{\text{PSn}} = 226$  Hz).

$^{119}\text{Sn}\{^1\text{H}\}$ -NMR (149.21 MHz, 298 K,  $\text{CD}_2\text{Cl}_2$ ):  $\delta$  = 85.3 ( $^2J_{\text{SnP}} = 226$  Hz).

Elemental analysis: calculated for  $\text{C}_{22}\text{H}_{36}\text{Cl}_4\text{P}_2\text{PdSn}_2$ : C: 31.16%, H: 4.28%; found: C: 30.94%, H: 4.25%.

### Synthesis of platinum complex **2b**

Platinum(II) chloride (198 mg; 0.75 mmol) and **1a** (500 mg; 1.49 mmol) were mixed in 50 mL thf and stirred overnight. The yellow solution was reduced to approximately half of its volume and the same amount of hexane was added. The resulting solution was stored at 253 K to obtain **2b** in the form of yellow crystals.

Yield: 356 mg; 26%.

$^1\text{H-NMR}$  (400.13 MHz, 298 K,  $\text{CD}_2\text{Cl}_2$ ):  $\delta$  = 7.56-7.11 (br, 1H, CpH), 7.07-6.43 (br, 3H, CpH), 4.84-4.28 (br, 1H, CpH), 2.95-2.86 (m, 2H, CH), 1.33 (q, 6H,  $J = 8.2$  Hz,  $\text{CH}_3$ ), 1.08 (br, 6H,  $\text{CH}_3$ ).

$^{13}\text{C}\{^1\text{H}\}$ -NMR (100.62 MHz, 298 K,  $\text{CD}_2\text{Cl}_2$ ):  $\delta$  = 141.2 (br, CpC), 137.3 (br, CpC), 133.0 (s,  $J_{\text{Cpt}} = 59$  Hz, CpC), 129.4 (br, CpC), 76.4 (br, CpC), 28.6 (br, CH), 26.1 (br, CH), 19.2 (br,  $\text{CH}_3$ ).

$^{31}\text{P}\{^1\text{H}\}$ -NMR (161.98 MHz, 298 K,  $\text{CD}_2\text{Cl}_2$ ):  $\delta$  = 32.4 ( $^1J_{\text{PPt}} = 2092$  Hz,  $^2J_{\text{PSn}} = 202$  Hz).

$^{119}\text{Sn}\{^1\text{H}\}$ -NMR (149.21 MHz, 298 K,  $\text{CD}_2\text{Cl}_2$ ):  $\delta$  = 42.8 ( $^2J_{\text{SnP}} = 202$  Hz).

Elemental analysis: calculated for  $\text{C}_{22}\text{H}_{36}\text{Cl}_4\text{P}_2\text{PtSn}_2$ : C: 28.21%, H: 3.87%; found: C: 28.28%, H: 3.54%.

### Synthesis of silverchloride complex **3**

**1a** (200 mg; 0.60 mmol) and silver tetrakis(perfluoro-*tert*-butoxy)aluminate (641 mg; 0.60 mmol) were stirred in 30 mL *o*-difluorobenzene at room temperature for two hours. After filtration of the obtained suspension, 30 mL toluene were added to the filtrate and the solution was stored at 253 K overnight affording colorless crystals of **3**.

Yield: 348 mg; 22%.

$^1\text{H-NMR}$  (400.13 MHz, 298 K,  $\text{CD}_2\text{Cl}_2$ ):  $\delta$  = 7.03 (s, 2H, CpH), 6.75 (s, 2H, CpH), 2.63-2.52 (m, 2H, CH), 1.35-1.20 (m, 12H,  $\text{CH}_3$ ).

$^{13}\text{C}\{^1\text{H}\}$ -NMR (75.48 MHz, 298 K,  $\text{CD}_2\text{Cl}_2$ ):  $\delta$  = 121.8 (q,  $J_{\text{CF}} = 293$  Hz,  $\text{CF}_3$ ), 119.6 (s, CpC), 118.5 (s, CpC), 117.4 (s, CpC), 110.1-109.6 (m, CpC), 24.4-24.1 (m, CH), 20.4-20.1 (m,  $\text{CH}_3$ ).

$^{19}\text{F}\{^1\text{H}\}$ -NMR (282.38 MHz, 298 K,  $\text{CD}_2\text{Cl}_2$ ):  $\delta$  = -75.6.

$^{27}\text{Al}\{^1\text{H}\}$ -NMR (78.20 MHz, 298 K,  $\text{CD}_2\text{Cl}_2$ )  $\delta$  = 34.8.

$^{31}\text{P}\{^1\text{H}\}$ -NMR (161.98 MHz, 298 K,  $\text{CD}_2\text{Cl}_2$ ):  $\delta$  = 27.9 ( $^1J_{\text{PAg}} = 471$  Hz ( $^{107}\text{Ag}$ ),  $^1J_{\text{PAg}} = 544$  Hz ( $^{109}\text{Ag}$ )).

$^{119}\text{Sn}\{^1\text{H}\}$ -NMR (149.21 MHz, 298 K).  $\delta$  = -2122.

Elemental analysis: calculated for  $\text{C}_{54}\text{H}_{36}\text{AgAl}_2\text{ClF}_{72}\text{O}_8\text{P}_2\text{Sn}_2$ : C: 24.22%, H: 1.36%; found: C: 24.80%, H: 1.47%.

## 2. NMR Spectra

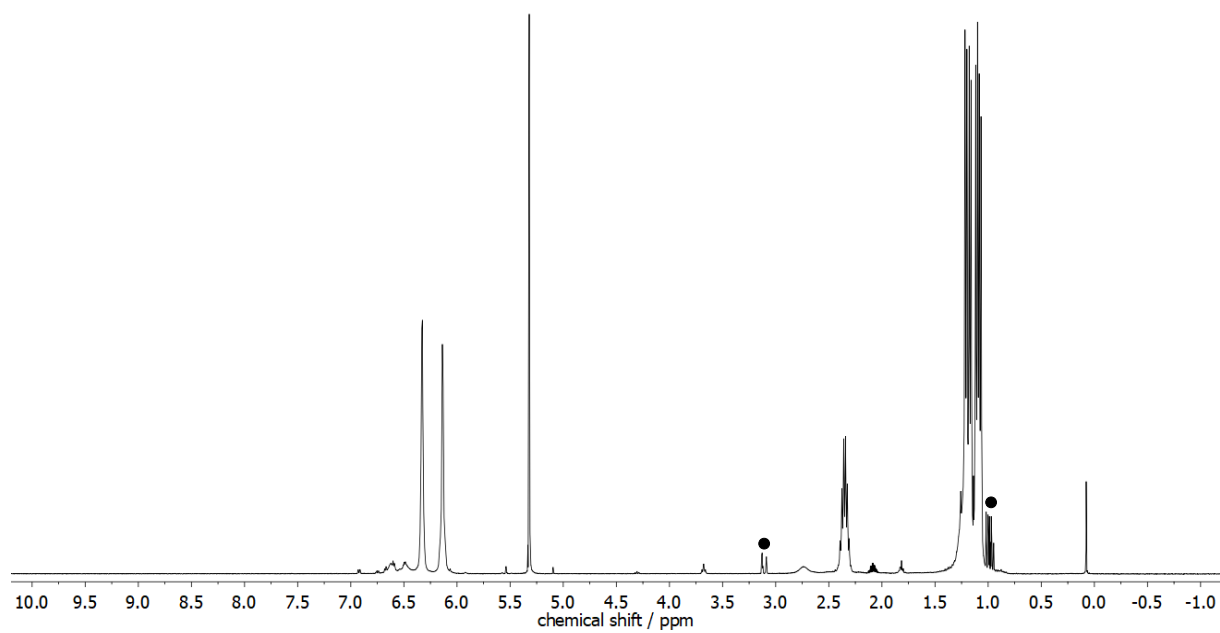

Figure S1:  $^1\text{H}$  NMR spectrum ( $\text{CD}_2\text{Cl}_2$ ) of **1a** (● free ligand).

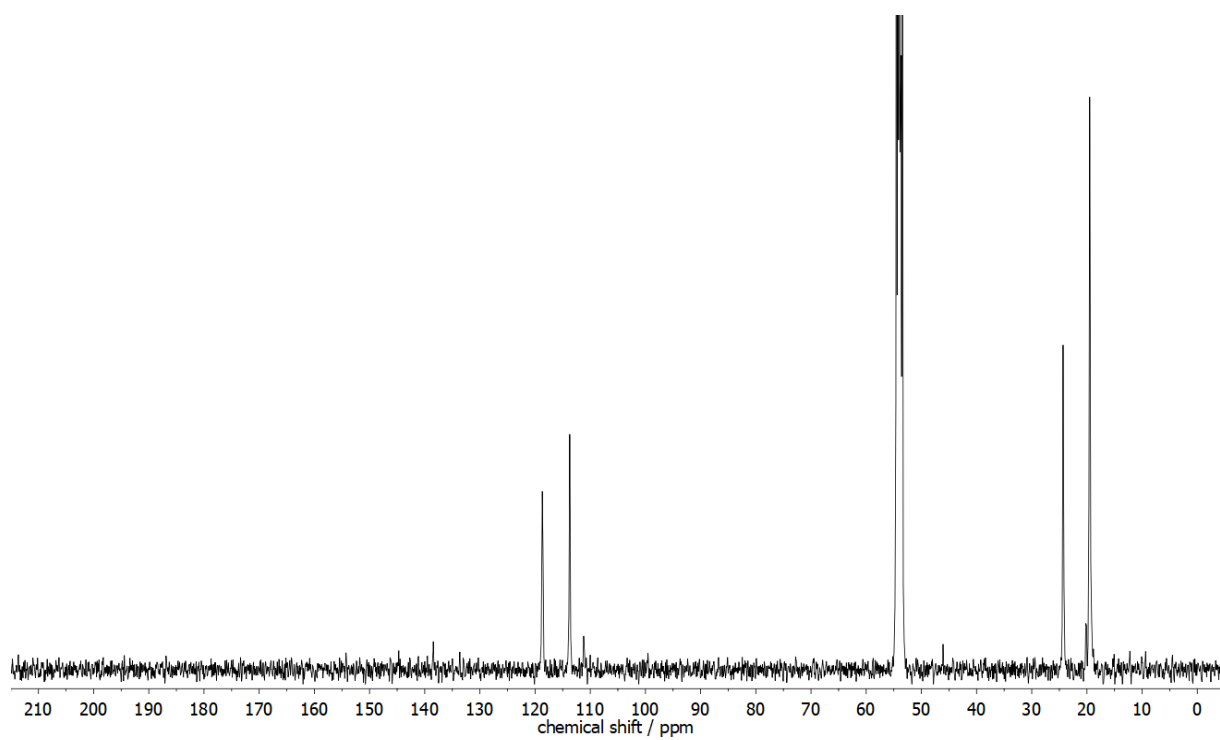

Figure S2:  $^{13}\text{C}\{^1\text{H}\}$  NMR spectrum ( $\text{CD}_2\text{Cl}_2$ ) of **1a**.

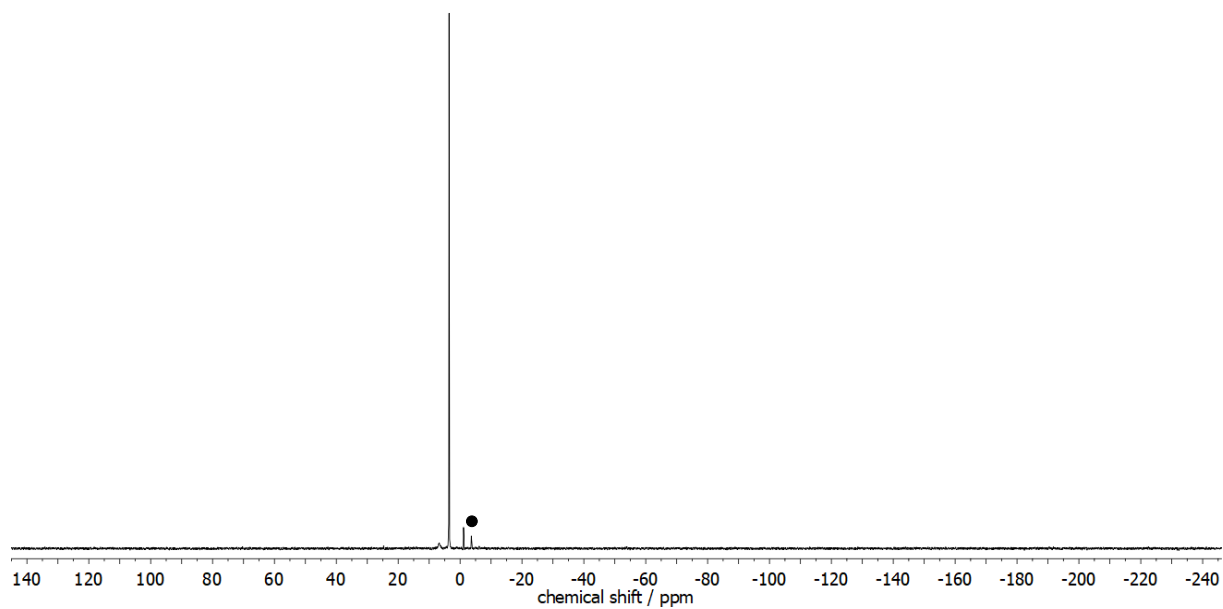

Figure S3:  $^{31}\text{P}\{^1\text{H}\}$  NMR spectrum ( $\text{CD}_2\text{Cl}_2$ ) of **1a** (● free ligand).

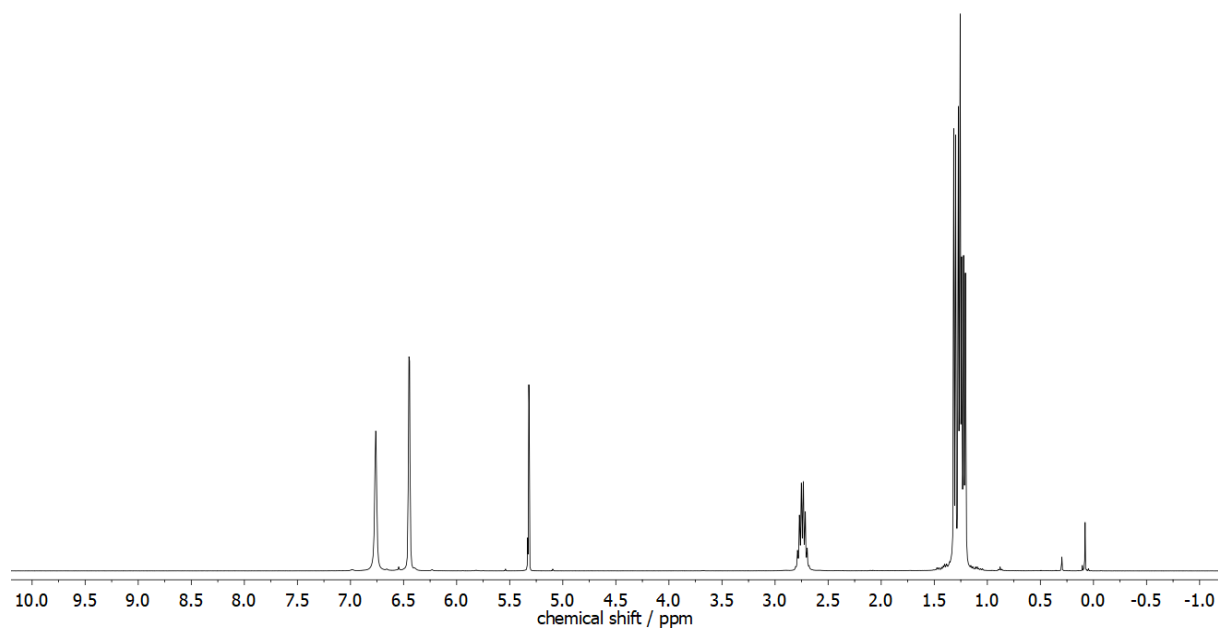

Figure S4:  $^1\text{H}$  NMR spectrum ( $\text{CD}_2\text{Cl}_2$ ) of **1b**.

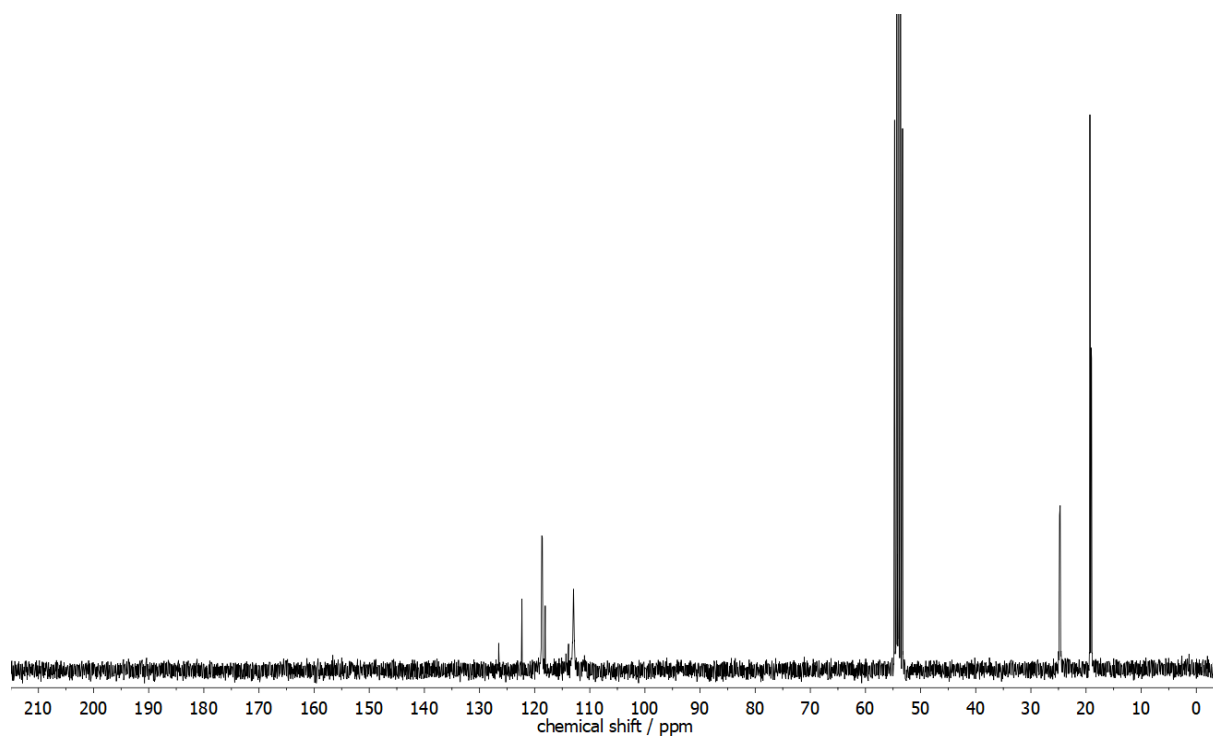

Figure S5:  $^{13}\text{C}\{^1\text{H}\}$  NMR spectrum ( $\text{CD}_2\text{Cl}_2$ ) of **1b**.

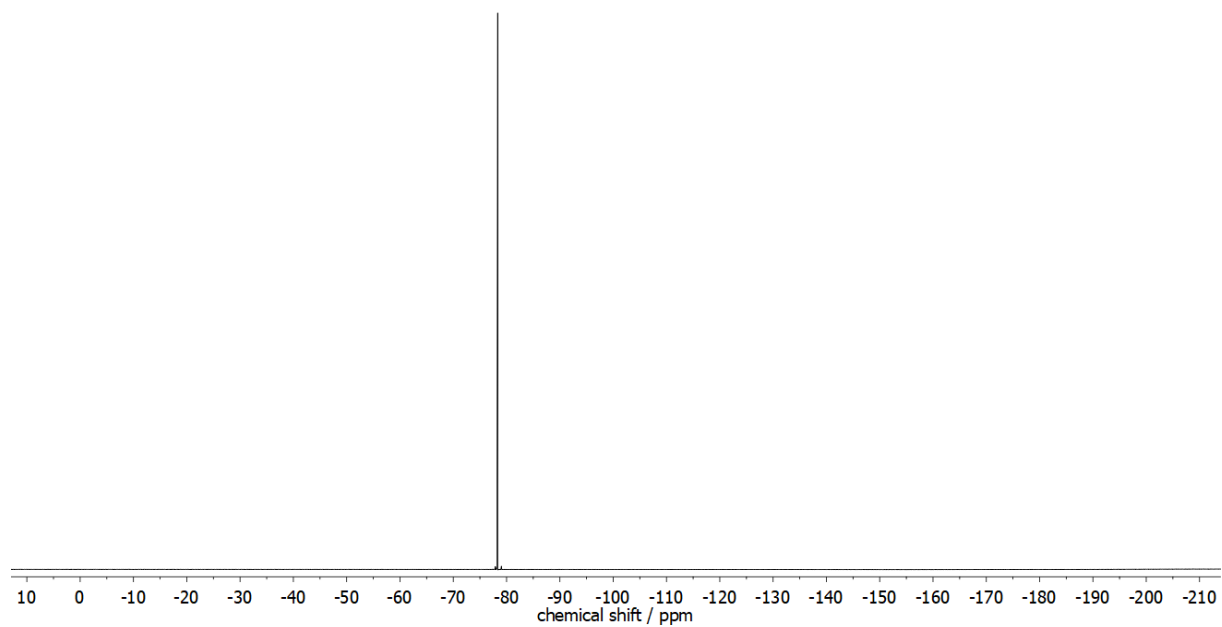

Figure S6:  $^{19}\text{F}\{^1\text{H}\}$  NMR spectrum ( $\text{CD}_2\text{Cl}_2$ ) of **1b**.

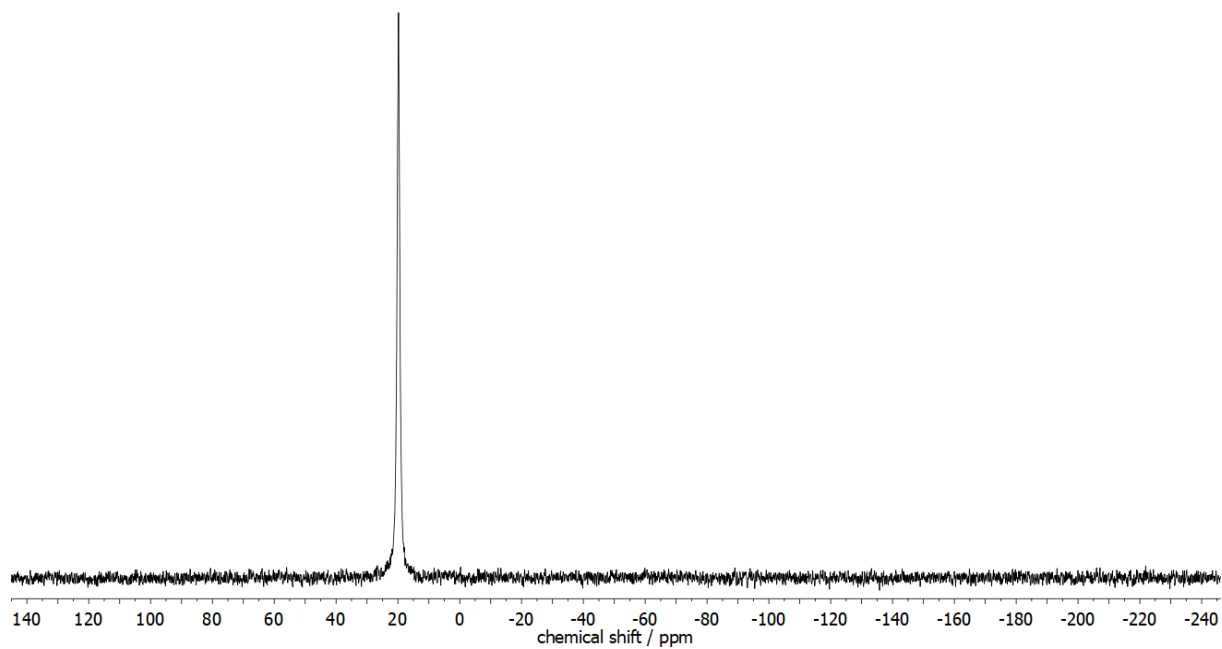

Figure S7:  $^{31}\text{P}\{^1\text{H}\}$  NMR spectrum ( $\text{CD}_2\text{Cl}_2$ ) of **1b**.

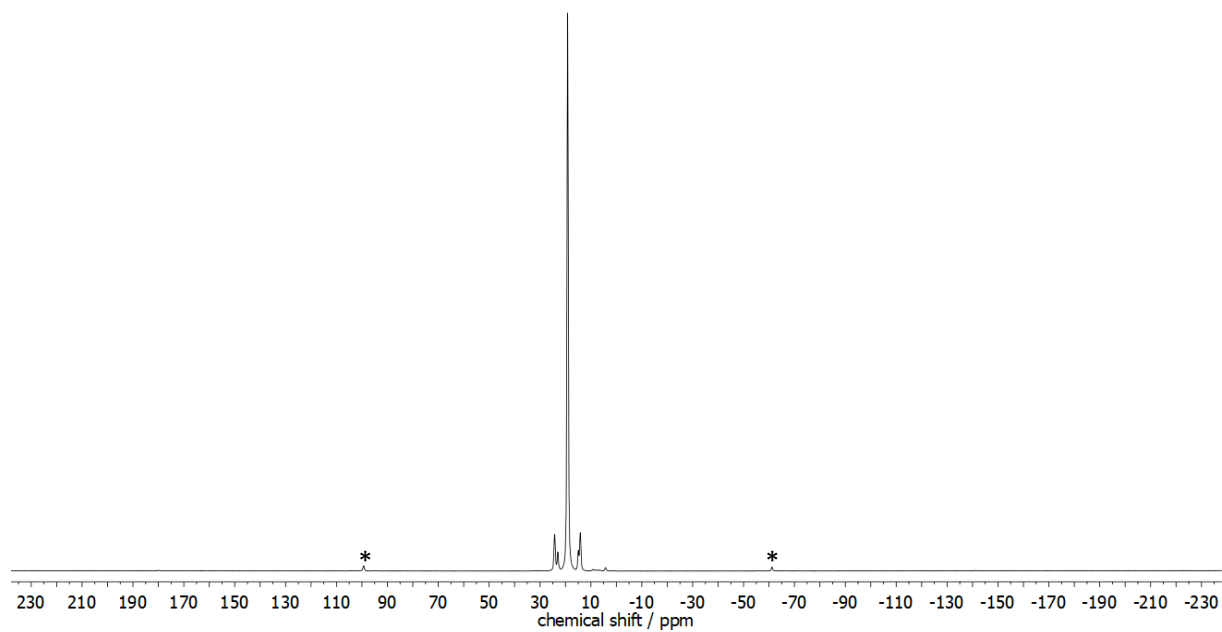

Figure S8:  $^{31}\text{P}\{^1\text{H}\}$  CP/MAS NMR spectrum (13 kHz) of **1b** (\* = spinning sidebands).



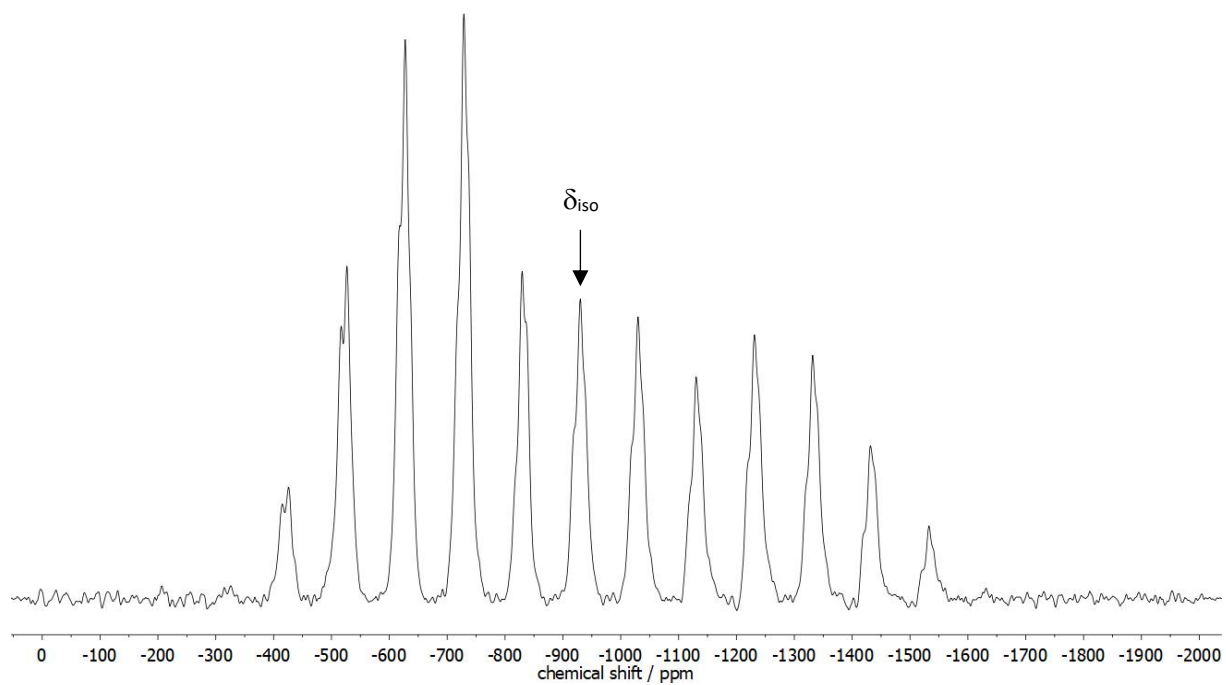

Figure S9:  $^{119}\text{Sn}\{^1\text{H}\}$  CP/MAS NMR spectrum (13 kHz) of **1b**.

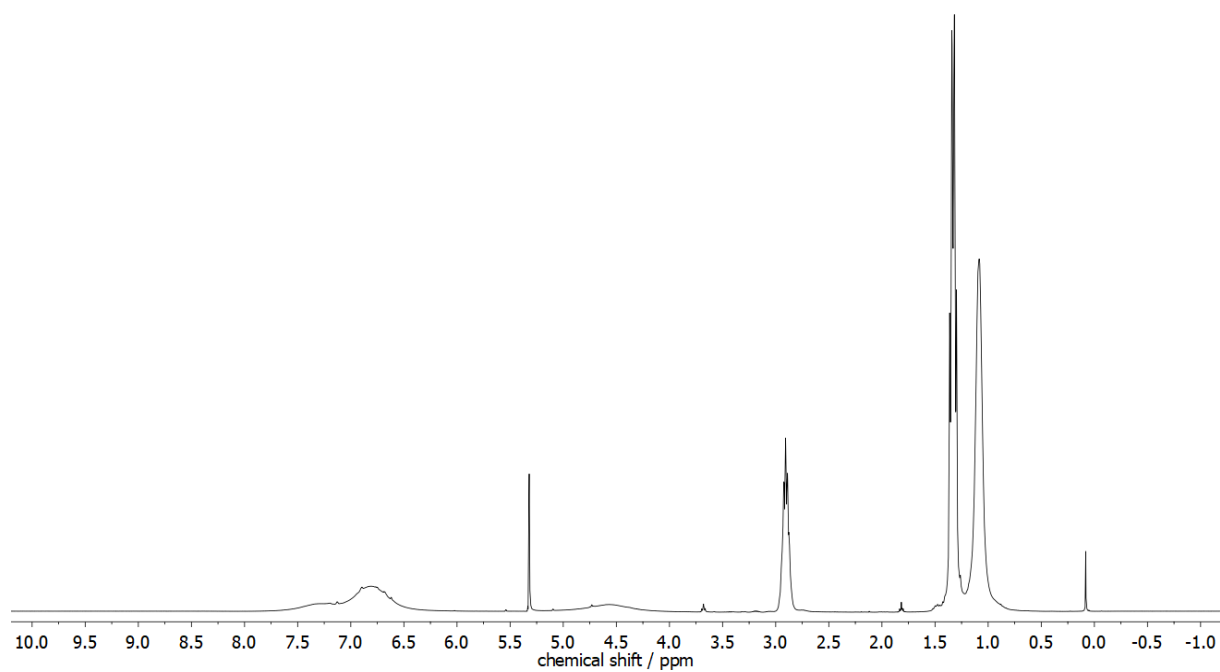

Figure S10:  $^1\text{H}$  NMR spectrum ( $\text{CD}_2\text{Cl}_2$ ) of **2b**. Pt

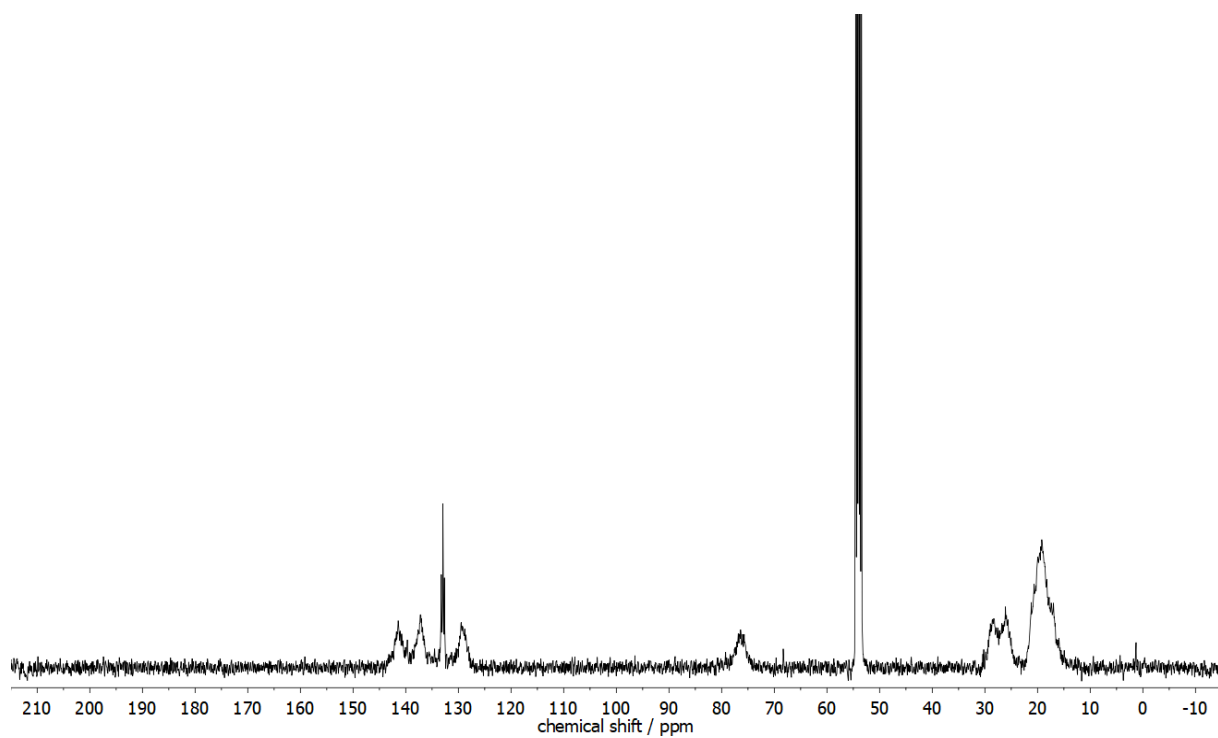

Figure S11:  $^{13}\text{C}\{^1\text{H}\}$  NMR spectrum ( $\text{CD}_2\text{Cl}_2$ ) of **2b**.

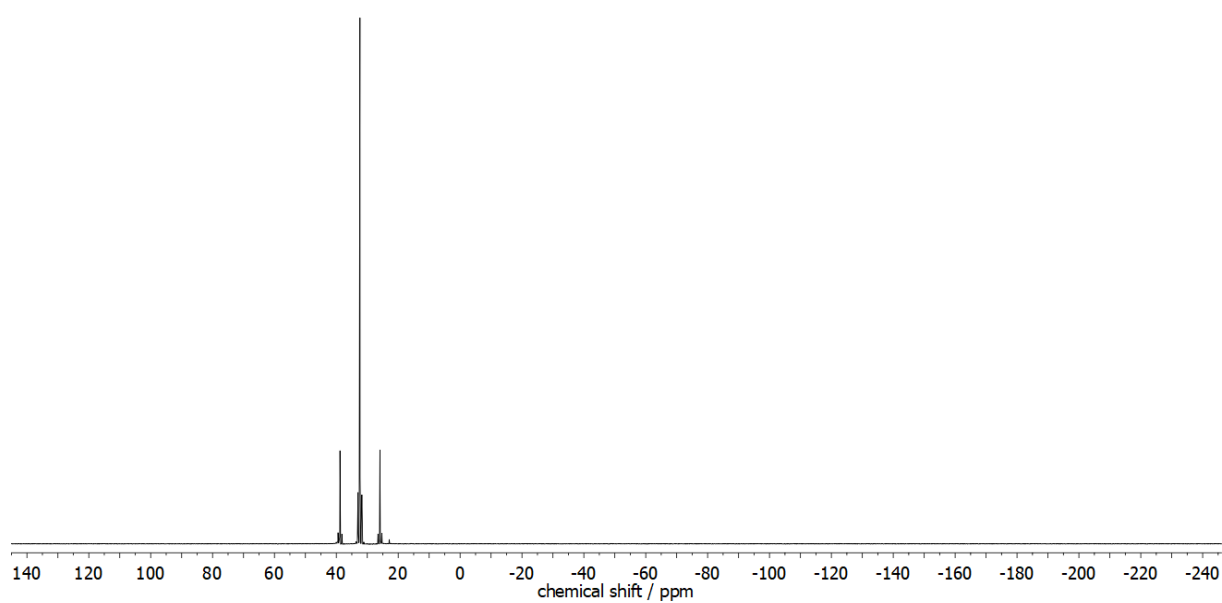

Figure S12:  $^{31}\text{P}\{^1\text{H}\}$  NMR spectrum ( $\text{CD}_2\text{Cl}_2$ ) of **2b**.

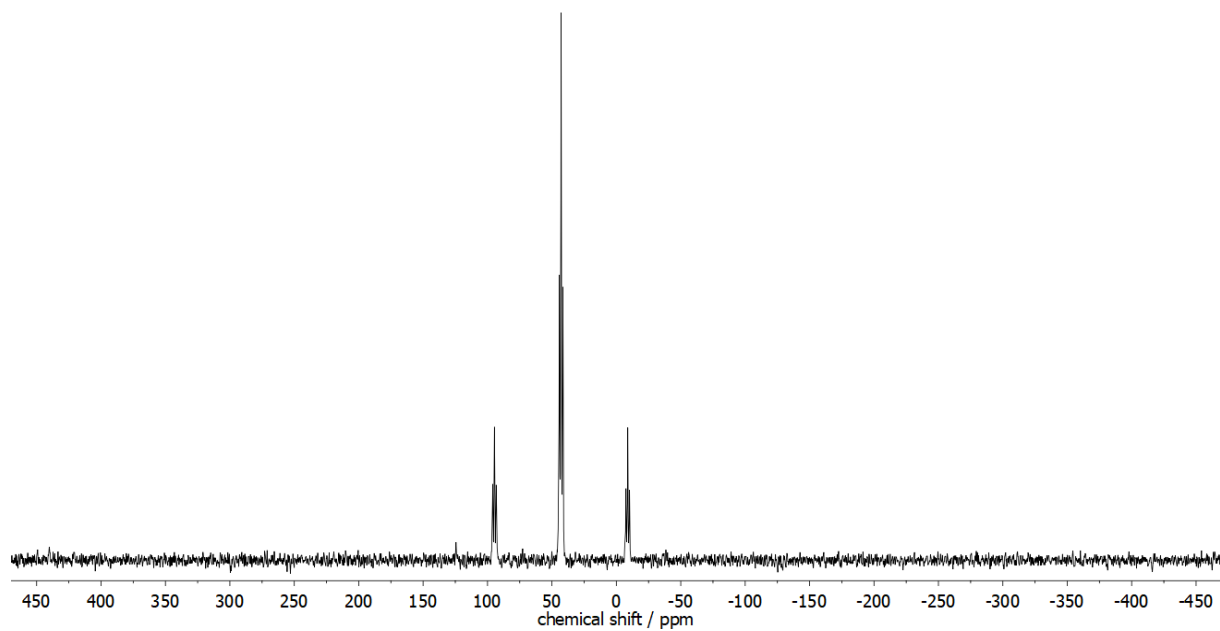

Figure S13:  $^{119}\text{Sn}\{^1\text{H}\}$  NMR spectrum ( $\text{CD}_2\text{Cl}_2$ ) of **2b**. Pt

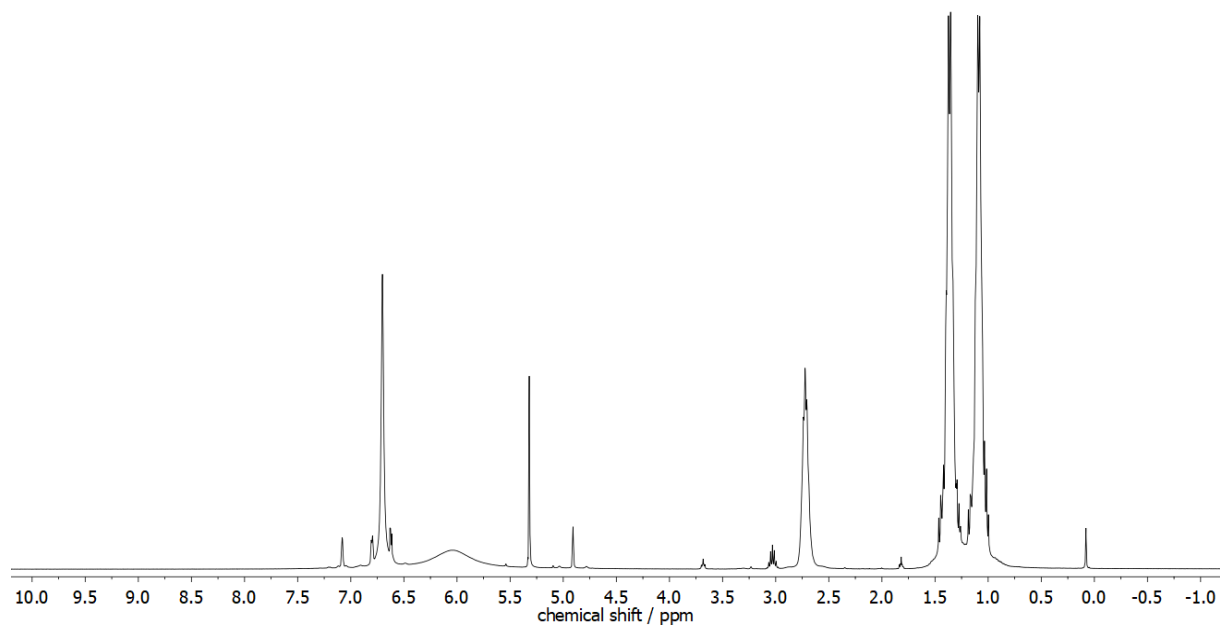

Figure S14:  $^1\text{H}$  NMR spectrum ( $\text{CD}_2\text{Cl}_2$ ) of **2a**.

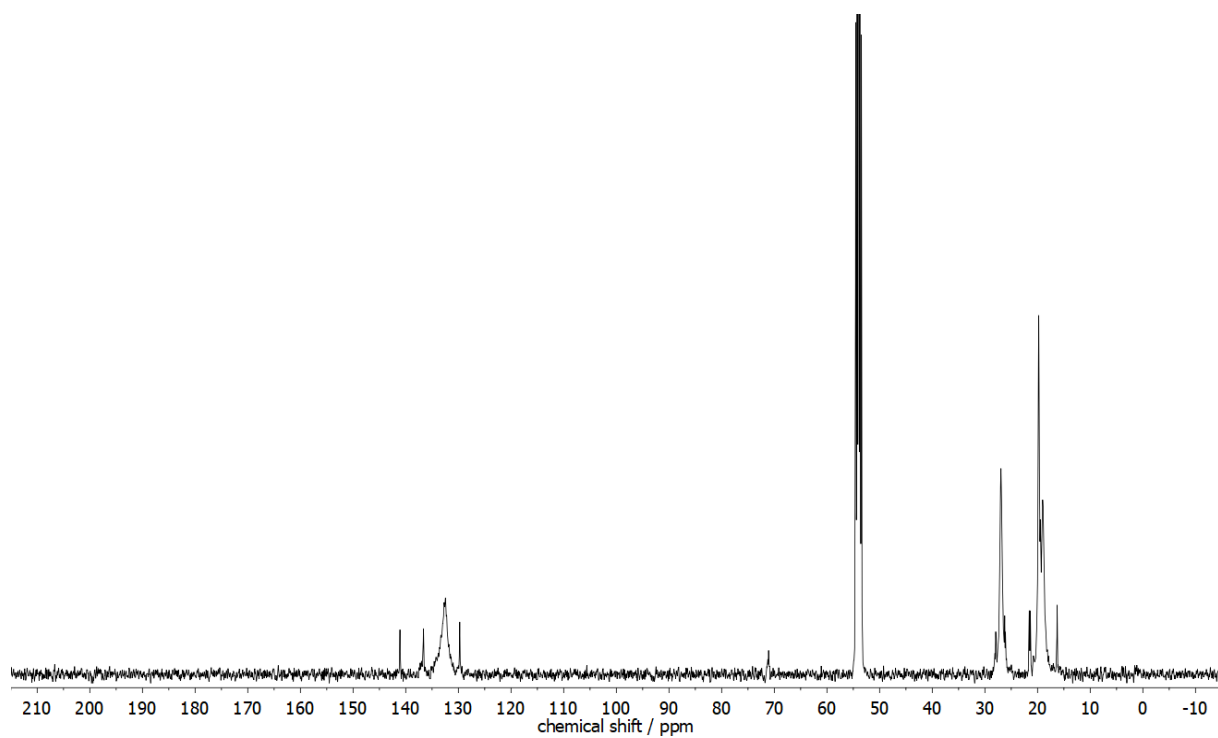

Figure S15:  $^{13}\text{C}\{^1\text{H}\}$  NMR spectrum ( $\text{CD}_2\text{Cl}_2$ ) of **2a**.

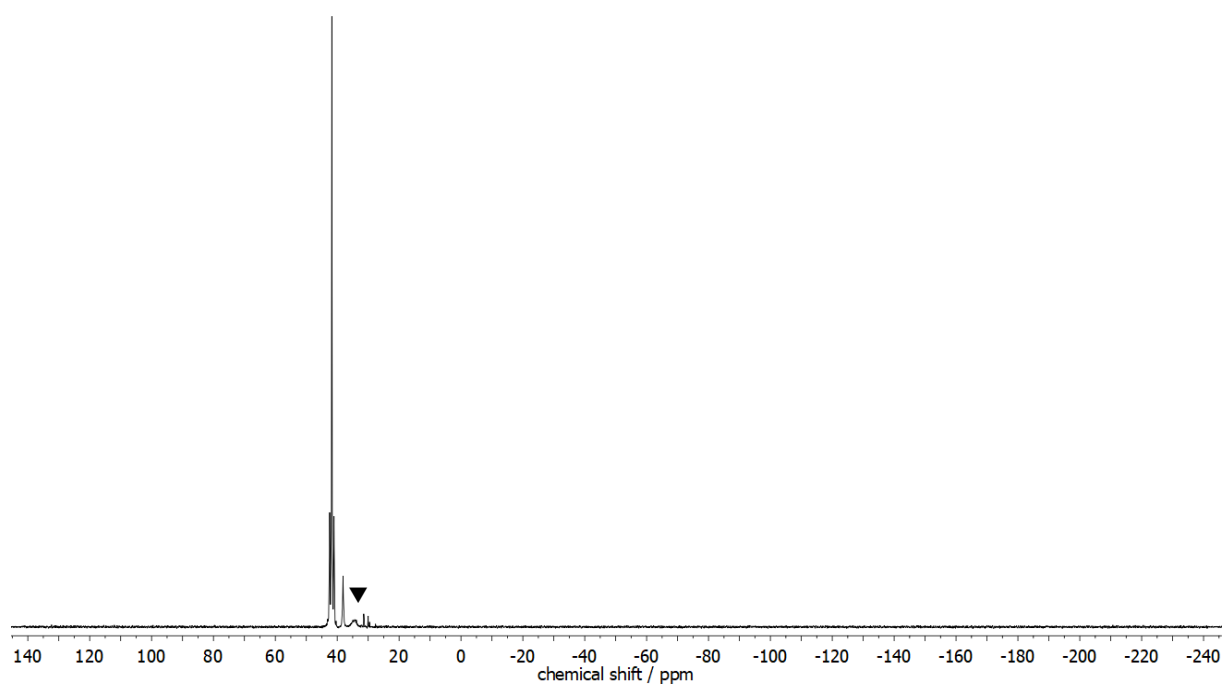

Figure S16:  $^{31}\text{P}\{^1\text{H}\}$  NMR spectrum ( $\text{CD}_2\text{Cl}_2$ ) of **2a** ( $\blacktriangledown$  unidentified byproduct).

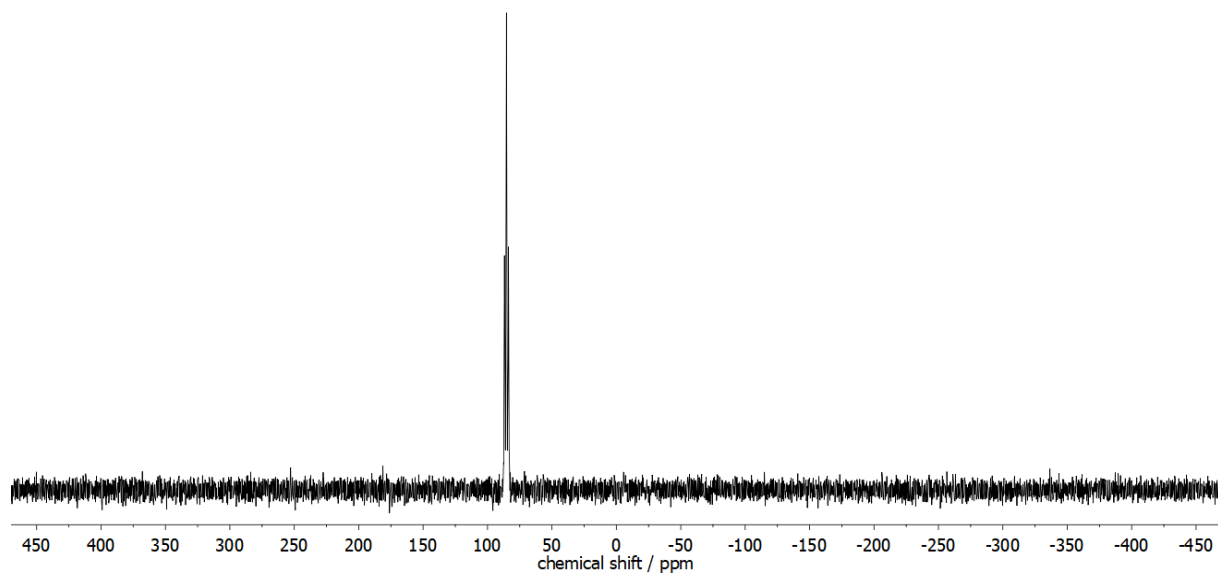

Figure S17:  $^{119}\text{Sn}\{^1\text{H}\}$  NMR spectrum ( $\text{CD}_2\text{Cl}_2$ ) of **2a**.

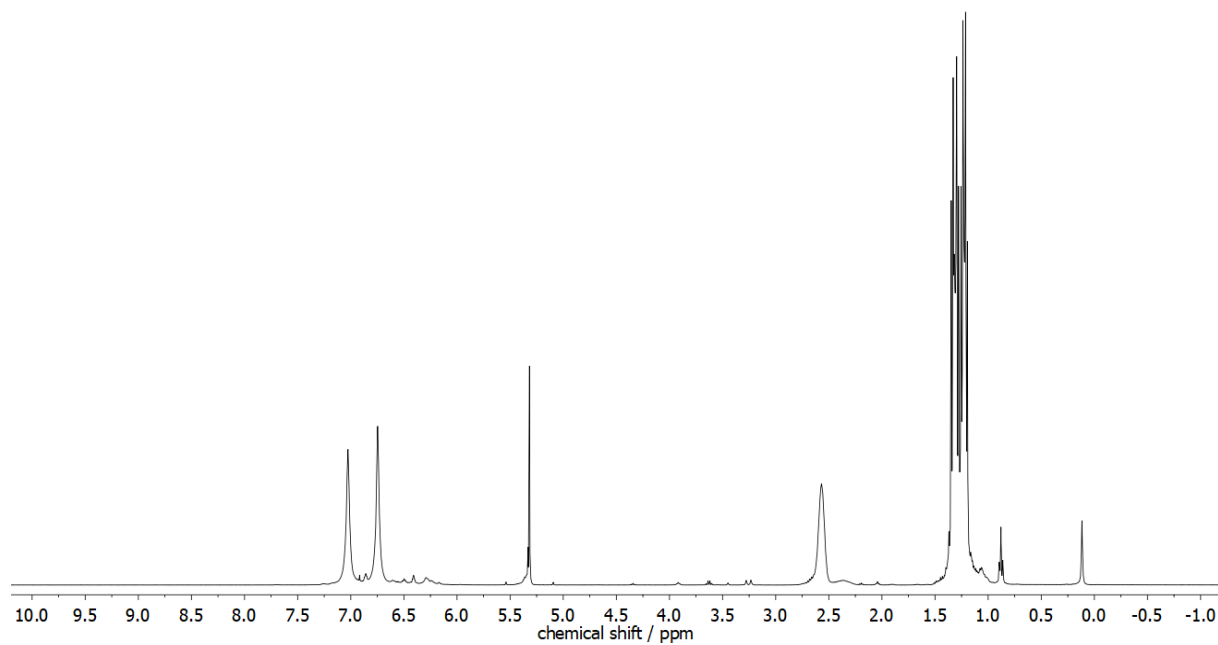

Figure S18:  $^1\text{H}$  NMR spectrum ( $\text{CD}_2\text{Cl}_2$ ) of **3**.

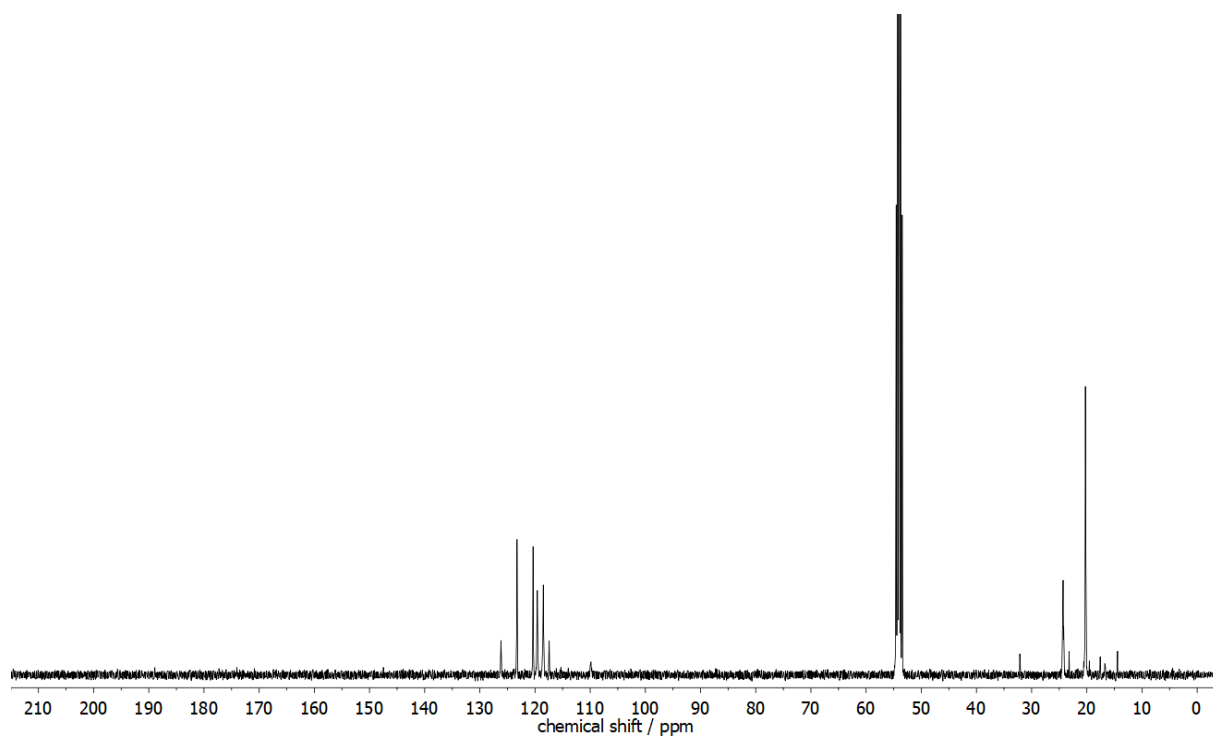

Figure S19:  $^{13}\text{C}\{^1\text{H}\}$  NMR spectrum ( $\text{CD}_2\text{Cl}_2$ ) of **3**.

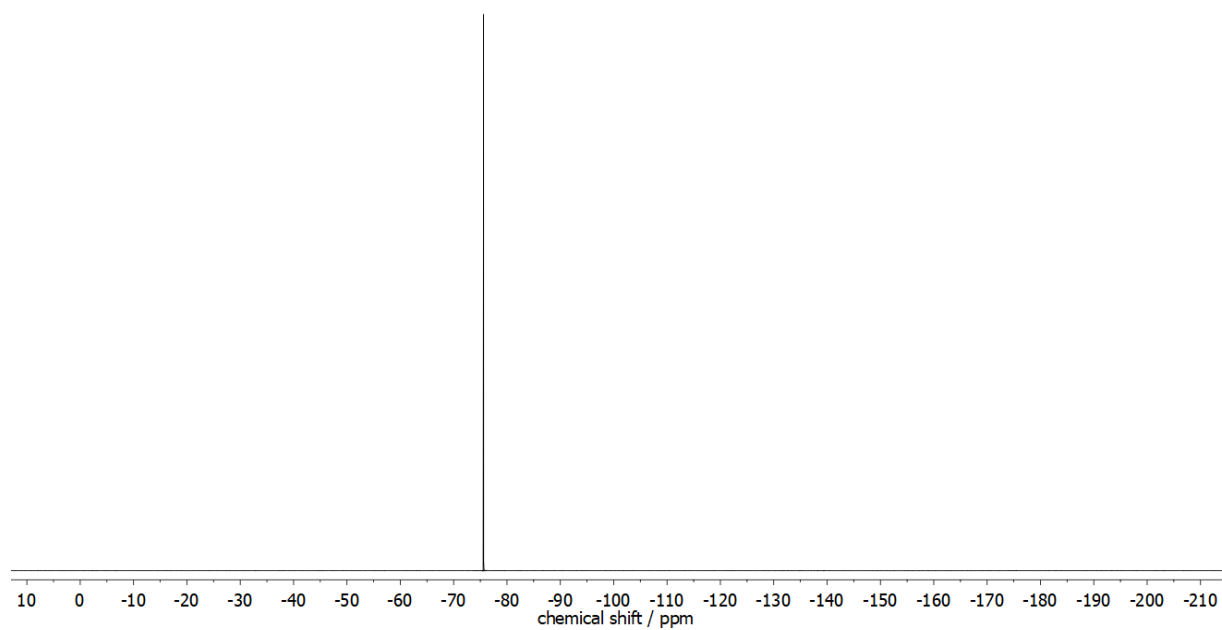

Figure S20:  $^{19}\text{F}\{^1\text{H}\}$  NMR spectrum ( $\text{CD}_2\text{Cl}_2$ ) of **3**.

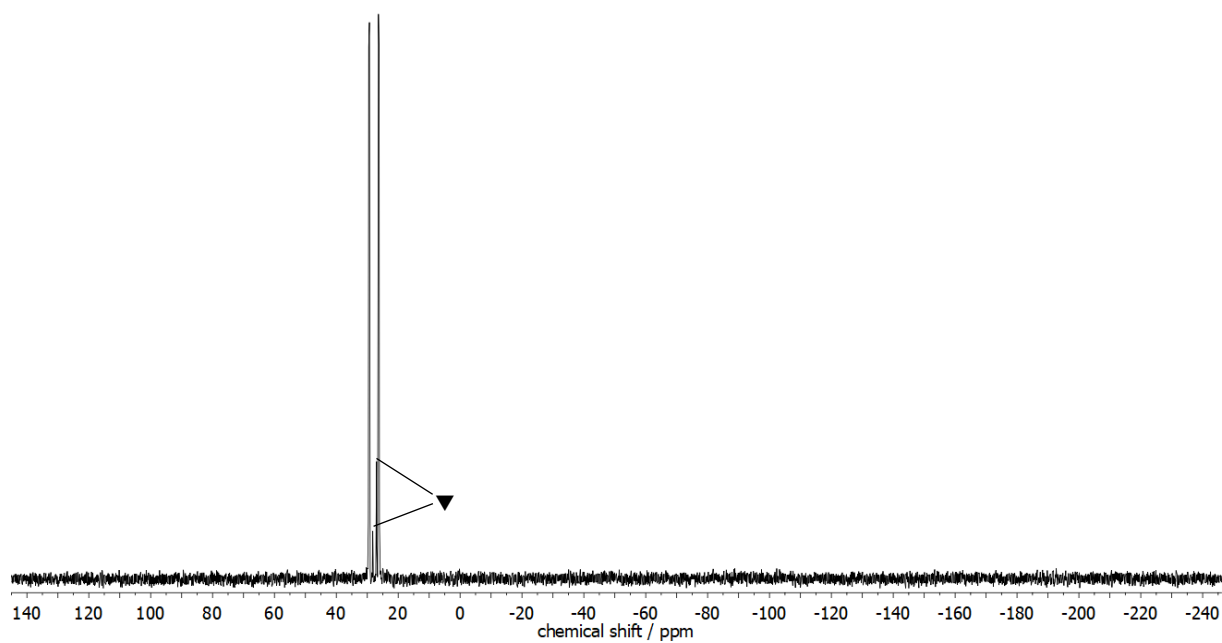

Figure S21:  $^{31}\text{P}\{^1\text{H}\}$  NMR spectrum ( $\text{CD}_2\text{Cl}_2$ ) of **3** (▼unidentified decomposition products).

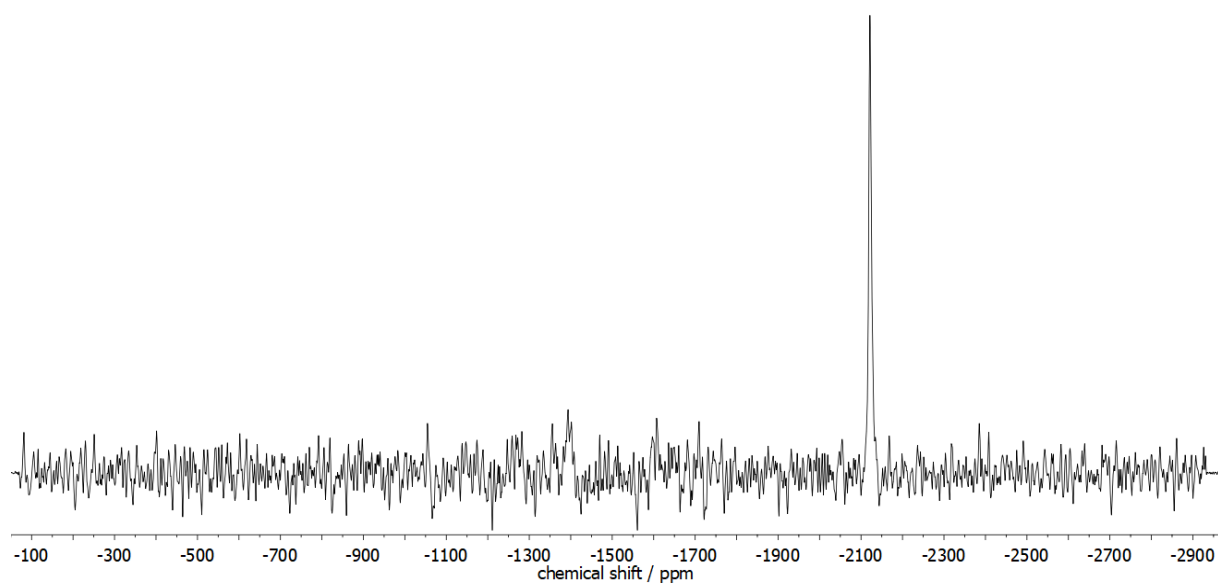

Figure S22:  $^{119}\text{Sn}\{^1\text{H}\}$  NMR spectrum ( $\text{CD}_2\text{Cl}_2$ ) of **3**.

### 3. MS Spectra

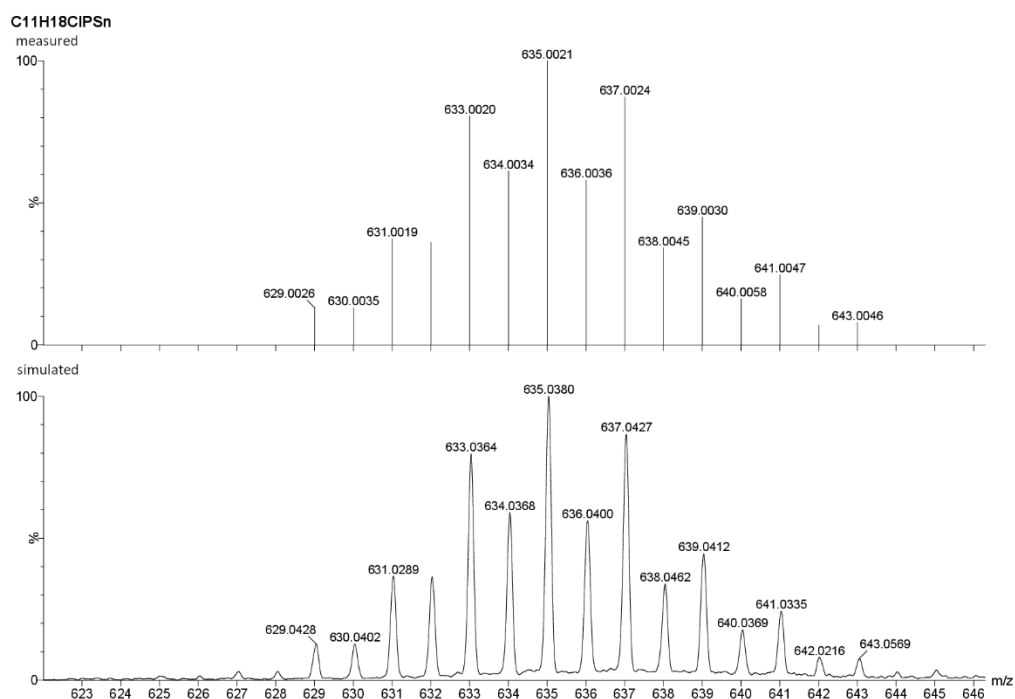

Figure S23: LIFDI mass spectrum of **1a** (635.00 ( $C_{22}H_{36}ClP_2Sn_2^+$ )).

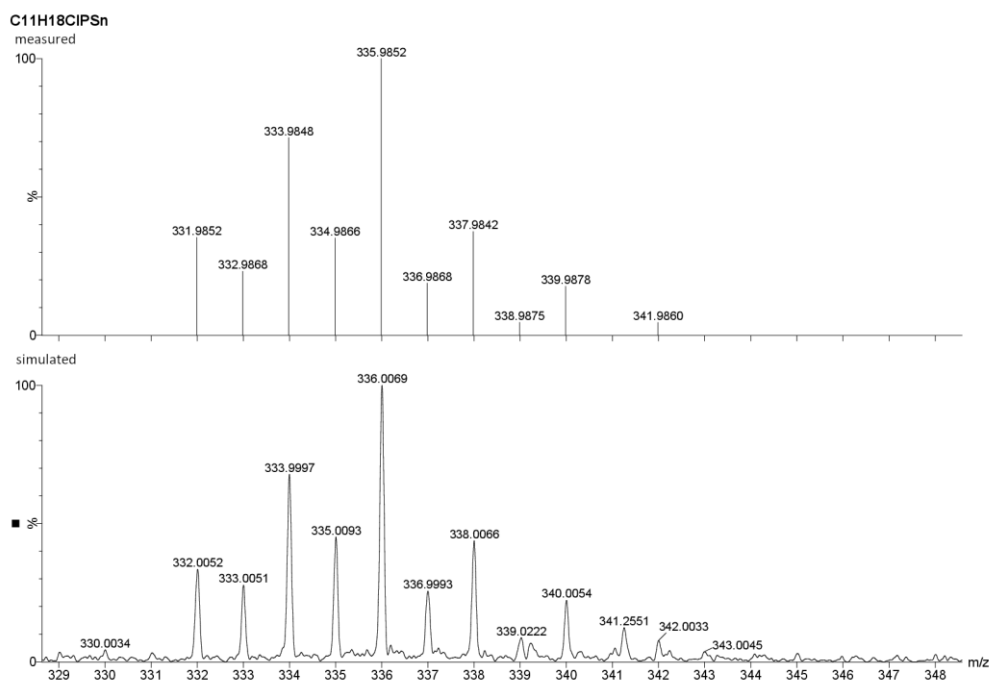

Figure S24: LIFDI mass spectrum of **1a** (335.98 ( $C_{11}H_{18}ClP_2Sn^+$ )).



## 4. XRD Data

### Structural details for **1a**

|                                   |                                             |                            |
|-----------------------------------|---------------------------------------------|----------------------------|
| CCDC Deposition Number            | 2242130                                     |                            |
| Empirical formula                 | $C_{22}H_{36}Cl_2P_2Sn_2$                   |                            |
| Formula weight                    | 670.73                                      |                            |
| Temperature                       | 152(2) K                                    |                            |
| Wavelength                        | 0.71073 Å                                   |                            |
| Crystal system                    | monoclinic                                  |                            |
| Space group                       | $P2_1/c$                                    |                            |
| Unit cell dimensions              | $a = 8.1679(7)$ Å                           | $\alpha = 90^\circ$        |
|                                   | $b = 14.8501(12)$ Å                         | $\beta = 108.184(3)^\circ$ |
|                                   | $c = 11.1754(11)$ Å                         | $\gamma = 90^\circ$        |
| Volume                            | $1287.8(2)$ Å <sup>3</sup>                  |                            |
| Z                                 | 2                                           |                            |
| Density (calculated)              | 1.730 mg/m <sup>3</sup>                     |                            |
| Absorption coefficient            | 2.279 mm <sup>-1</sup>                      |                            |
| F(000)                            | 664                                         |                            |
| Crystal size                      | 0.341 x 0.242 x 0.168 mm <sup>3</sup>       |                            |
| Theta range for data collection   | 2.358 to 27.400°                            |                            |
| Index ranges                      | -10<=h<=9, -19<=k<=17, -14<=l<=14           |                            |
| Reflections collected             | 17249                                       |                            |
| Independent reflections           | 2893 [R(int) = 0.0288]                      |                            |
| Completeness to theta = 25.242°   | 98.9%                                       |                            |
| Absorption correction             | semi-empirical from equivalents             |                            |
| Max. and min. transmission        | 0.7455 and 0.6442                           |                            |
| Refinement method                 | full-matrix least-squares on F <sup>2</sup> |                            |
| Data / restraints / parameters    | 2893 / 0 / 199                              |                            |
| Goodness-of-fit on F <sup>2</sup> | 1.331                                       |                            |
| Final R indices [I>2sigma(I)]     | R1 = 0.0351, wR2 = 0.0739                   |                            |
| R indices (all data)              | R1 = 0.0421, wR2 = 0.0759                   |                            |
| Extinction coefficient            | n/a                                         |                            |
| Largest diff. peak and hole       | 1.311 and -0.608 e.Å <sup>-3</sup>          |                            |

## Structural details for **1b**

|                                   |                                                                                                                                                     |
|-----------------------------------|-----------------------------------------------------------------------------------------------------------------------------------------------------|
| CCDC Deposition Number            | 2242136                                                                                                                                             |
| Empirical formula                 | $C_{26}H_{40}Cl_4FeO_6P_2S_2Sn_2$                                                                                                                   |
| Formula weight                    | 1067.82                                                                                                                                             |
| Temperature                       | 132(2) K                                                                                                                                            |
| Wavelength                        | 0.71073 Å                                                                                                                                           |
| Crystal system                    | triclinic                                                                                                                                           |
| Space group                       | <i>P</i> -1                                                                                                                                         |
| Unit cell dimensions              | $a = 8.8758(3)$ Å $\alpha = 74.9070(10)^\circ$<br>$b = 10.4870(3)$ Å $\beta = 72.2070(10)^\circ$<br>$c = 12.3520(4)$ Å $\gamma = 67.5200(10)^\circ$ |
| Volume                            | 998.00(6) Å <sup>3</sup>                                                                                                                            |
| Z                                 | 1                                                                                                                                                   |
| Density (calculated)              | 1.777 mg/m <sup>3</sup>                                                                                                                             |
| Absorption coefficient            | 1.768 mm <sup>-1</sup>                                                                                                                              |
| F(000)                            | 528                                                                                                                                                 |
| Crystal size                      | 0.439 x 0.285 x 0.176 mm <sup>3</sup>                                                                                                               |
| Theta range for data collection   | 1.755 to 27.905°                                                                                                                                    |
| Index ranges                      | -11 ≤ h ≤ 11, -10 ≤ k ≤ 13, -16 ≤ l ≤ 16                                                                                                            |
| Reflections collected             | 15330                                                                                                                                               |
| Independent reflections           | 4781 [R(int) = 0.0132]                                                                                                                              |
| Completeness to theta = 25.242°   | 100.0%                                                                                                                                              |
| Absorption correction             | semi-empirical from equivalents                                                                                                                     |
| Max. and min. transmission        | 0.7456 and 0.6141                                                                                                                                   |
| Refinement method                 | full-matrix least-squares on F <sup>2</sup>                                                                                                         |
| Data / restraints / parameters    | 4781 / 169 / 270                                                                                                                                    |
| Goodness-of-fit on F <sup>2</sup> | 1.045                                                                                                                                               |
| Final R indices [I > 2σ(I)]       | R1 = 0.0159, wR2 = 0.0373                                                                                                                           |
| R indices (all data)              | R1 = 0.0171, wR2 = 0.0378                                                                                                                           |
| Extinction coefficient            | n/a                                                                                                                                                 |
| Largest diff. peak and hole       | 0.919 and -1.056 e.Å <sup>-3</sup>                                                                                                                  |

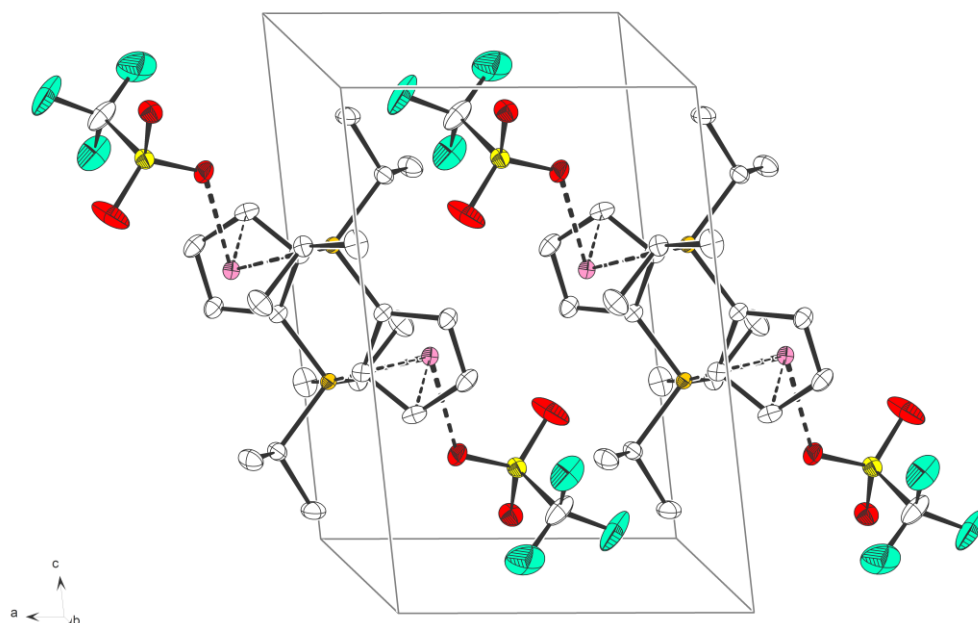

## Structural details for **2a**

|                                   |                                                          |                                                                          |
|-----------------------------------|----------------------------------------------------------|--------------------------------------------------------------------------|
| CCDC Deposition Number            | 2242132                                                  |                                                                          |
| Empirical formula                 | $C_{30}H_{52}Cl_4O_2P_2PdSn_2$                           |                                                                          |
| Formula weight                    | 992.23                                                   |                                                                          |
| Temperature                       | 130(2) K                                                 |                                                                          |
| Wavelength                        | 0.71073 Å                                                |                                                                          |
| Crystal system                    | monoclinic                                               |                                                                          |
| Space group                       | $C2/c$                                                   |                                                                          |
| Unit cell dimensions              | a = 18.1277(7) Å<br>b = 11.2789(7) Å<br>c = 19.2577(9) Å | $\alpha = 90^\circ$<br>$\beta = 101.435(2)^\circ$<br>$\gamma = 90^\circ$ |
| Volume                            | 3859.3(3) Å <sup>3</sup>                                 |                                                                          |
| Z                                 | 4                                                        |                                                                          |
| Density (calculated)              | 1.708 mg/m <sup>3</sup>                                  |                                                                          |
| Absorption coefficient            | 2.130 mm <sup>-1</sup>                                   |                                                                          |
| F(000)                            | 1968                                                     |                                                                          |
| Crystal size                      | 0.289 x 0.256 x 0.090 mm <sup>3</sup>                    |                                                                          |
| Theta range for data collection   | 2.139 to 36.361°                                         |                                                                          |
| Index ranges                      | -30 ≤ h ≤ 30, -18 ≤ k ≤ 18, -32 ≤ l ≤ 32                 |                                                                          |
| Reflections collected             | 155905                                                   |                                                                          |
| Independent reflections           | 9372 [R(int) = 0.0285]                                   |                                                                          |
| Completeness to theta = 25.242°   | 99.8%                                                    |                                                                          |
| Absorption correction             | semi-empirical from equivalents                          |                                                                          |
| Max. and min. transmission        | 0.7471 and 0.6397                                        |                                                                          |
| Refinement method                 | full-matrix least-squares on F <sup>2</sup>              |                                                                          |
| Data / restraints / parameters    | 9372 / 6 / 268                                           |                                                                          |
| Goodness-of-fit on F <sup>2</sup> | 1.148                                                    |                                                                          |
| Final R indices [I > 2σ(I)]       | R1 = 0.0172, wR2 = 0.0433                                |                                                                          |
| R indices (all data)              | R1 = 0.0178, wR2 = 0.0436                                |                                                                          |
| Extinction coefficient            | n/a                                                      |                                                                          |
| Largest diff. peak and hole       | 0.788 and -0.777 e.Å <sup>-3</sup>                       |                                                                          |

## Structural details for **2b**

|                                      |                                                                    |                            |
|--------------------------------------|--------------------------------------------------------------------|----------------------------|
| CCDC Deposition Number               | 2242131                                                            |                            |
| Empirical formula                    | $C_{30}H_{52}Cl_4O_2P_2PtSn_2$                                     |                            |
| Formula weight                       | 1080.92                                                            |                            |
| Temperature                          | 222(2) K                                                           |                            |
| Wavelength                           | 0.71073 Å                                                          |                            |
| Crystal system                       | monoclinic                                                         |                            |
| Space group                          | $C2/c$                                                             |                            |
| Unit cell dimensions                 | $a = 18.1877(9)$ Å                                                 | $\alpha = 90^\circ$        |
|                                      | $b = 11.4015(9)$ Å                                                 | $\beta = 101.731(2)^\circ$ |
|                                      | $c = 19.3541(10)$ Å                                                | $\gamma = 90^\circ$        |
| Volume                               | $3929.6(4)$ Å <sup>3</sup>                                         |                            |
| Z                                    | 4                                                                  |                            |
| Density (calculated)                 | 1.827 mg/m <sup>3</sup>                                            |                            |
| Absorption coefficient               | 5.191 mm <sup>-1</sup>                                             |                            |
| F(000)                               | 2096                                                               |                            |
| Crystal size                         | 0.184 x 0.161 x 0.033 mm <sup>3</sup>                              |                            |
| Theta range for data collection      | 2.121 to 27.959°                                                   |                            |
| Index ranges                         | $-23 \leq h \leq 23$ , $-15 \leq k \leq 14$ , $-25 \leq l \leq 25$ |                            |
| Reflections collected                | 28954                                                              |                            |
| Independent reflections              | 4723 [R(int) = 0.0486]                                             |                            |
| Completeness to theta = 25.242°      | 100.0%                                                             |                            |
| Absorption correction                | semi-empirical from equivalents                                    |                            |
| Max. and min. transmission           | 0.7456 and 0.6159                                                  |                            |
| Refinement method                    | full-matrix least-squares on F <sup>2</sup>                        |                            |
| Data / restraints / parameters       | 4723 / 18 / 224                                                    |                            |
| Goodness-of-fit on F <sup>2</sup>    | 1.032                                                              |                            |
| Final R indices [ $I > 2\sigma(I)$ ] | R1 = 0.0261, wR2 = 0.0507                                          |                            |
| R indices (all data)                 | R1 = 0.0379, wR2 = 0.0552                                          |                            |
| Extinction coefficient               | n/a                                                                |                            |
| Largest diff. peak and hole          | 0.469 and -0.827 e.Å <sup>-3</sup>                                 |                            |

### Structural details for $3[\text{Al}(\text{OC}(\text{CF}_3)_3)_2]$

|                                   |                                                                                         |                             |
|-----------------------------------|-----------------------------------------------------------------------------------------|-----------------------------|
| CCDC Deposition Number            | 2242137                                                                                 |                             |
| Empirical formula                 | $\text{C}_{68}\text{H}_{52}\text{AgAl}_2\text{ClF}_{72}\text{O}_8\text{P}_2\text{Sn}_2$ |                             |
| Formula weight                    | 2861.69                                                                                 |                             |
| Temperature                       | 133(2) K                                                                                |                             |
| Wavelength                        | 0.71073 Å                                                                               |                             |
| Crystal system                    | monoclinic                                                                              |                             |
| Space group                       | $P2_1/c$                                                                                |                             |
| Unit cell dimensions              | $a = 14.6726(5)$ Å                                                                      | $\alpha = 90^\circ$         |
|                                   | $b = 30.0339(11)$ Å                                                                     | $\beta = 94.9170(10)^\circ$ |
|                                   | $c = 22.3253(6)$ Å                                                                      | $\gamma = 90^\circ$         |
| Volume                            | $9802.0(6)$ Å <sup>3</sup>                                                              |                             |
| Z                                 | 4                                                                                       |                             |
| Density (calculated)              | 1.939 Mg/m <sup>3</sup>                                                                 |                             |
| Absorption coefficient            | 0.968 mm <sup>-1</sup>                                                                  |                             |
| F(000)                            | 5568                                                                                    |                             |
| Crystal size                      | 0.315 x 0.232 x 0.093 mm <sup>3</sup>                                                   |                             |
| Theta range for data collection   | 1.944 to 27.102°                                                                        |                             |
| Index ranges                      | -18<=h<=18, -33<=k<=38, -28<=l<=28                                                      |                             |
| Reflections collected             | 194671                                                                                  |                             |
| Independent reflections           | 21626 [R(int) = 0.0411]                                                                 |                             |
| Completeness to theta = 25.242°   | 100.0%                                                                                  |                             |
| Absorption correction             | semi-empirical from equivalents                                                         |                             |
| Max. and min. transmission        | 0.7461 and 0.6871                                                                       |                             |
| Refinement method                 | full-matrix least-squares on F <sup>2</sup>                                             |                             |
| Data / restraints / parameters    | 21626 / 10019 / 2177                                                                    |                             |
| Goodness-of-fit on F <sup>2</sup> | 1.026                                                                                   |                             |
| Final R indices [I>2sigma(I)]     | R1 = 0.0637, wR2 = 0.1769                                                               |                             |
| R indices (all data)              | R1 = 0.0782, wR2 = 0.1927                                                               |                             |
| Extinction coefficient            | n/a                                                                                     |                             |
| Largest diff. peak and hole       | 1.512 and -1.074 e.Å <sup>-3</sup>                                                      |                             |

#### Please note:

One of the  $\text{Al}(\text{OC}(\text{CF}_3)_3)_2$  anions and an incorporated toluene molecule are severely disordered, requiring a large number of restraints and resulting in a slightly elevated wR2.

## 5. Computational Details

All calculations were performed using the Gaussian 16, Revision C.01 package of programs.<sup>5</sup> Geometry optimizations have been carried out at the B3LYP-D3/def2-TZVP level of theory.<sup>6</sup> The optimized structures were confirmed to be a minimum on the potential energy surface by subsequent frequency analysis (all positive eigenvalues).

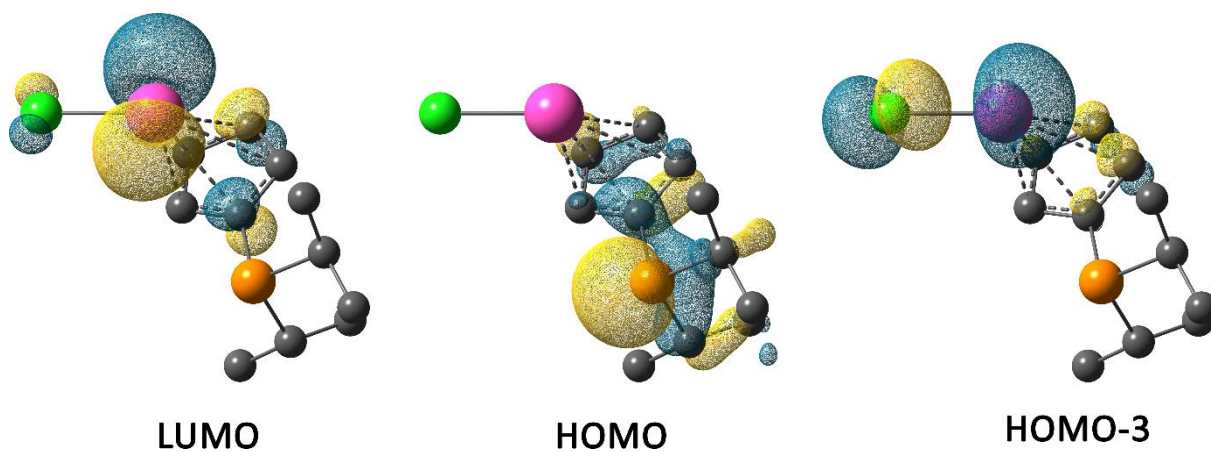

Figure S25: Kohn-Sham molecular orbital contours of **1a** (calculated at B3LYP-D3/def2-TZVPP//B3LYP-D3/def2-SVP; isodensity = 0.05 a.u.).

optimized geometry of **1a**

|    |             |             |             |
|----|-------------|-------------|-------------|
| Sn | 2.01584400  | -1.70201100 | 0.67930800  |
| P  | 2.54108400  | 0.96714100  | -0.09749100 |
| Cl | 4.26998400  | -2.26718000 | -0.16889200 |
| C  | 0.84328500  | -2.60140000 | -1.32763300 |
| H  | 3.46992300  | 0.28883000  | 2.66578700  |
| H  | -0.03797100 | -0.57546200 | -1.64327300 |
| H  | 0.03795300  | 0.57546300  | 1.64326100  |
| H  | 1.63814900  | -2.63224300 | -2.05900600 |
| C  | 1.13949200  | 1.98975400  | 0.33981400  |
| C  | 3.97240200  | 1.55782100  | 0.94752900  |
| C  | 3.00334800  | 1.41864000  | -1.84434400 |
| C  | 0.32178000  | -3.73107500 | -0.61185500 |
| C  | -0.10289900 | -1.54202900 | -1.17331700 |
| C  | 3.66324900  | 1.33753000  | 2.43248900  |
| Sn | -2.01584800 | 1.70200600  | -0.67932400 |
| C  | 0.10288600  | 1.54202900  | 1.17330300  |
| C  | 0.86509000  | 3.35100400  | 0.00310700  |
| C  | 4.36721500  | 3.01354700  | 0.68557000  |
| C  | 4.79682100  | 0.89712900  | 0.66424400  |
| H  | 4.36697800  | 0.84381100  | -2.24301300 |
| C  | 1.91911800  | 0.98804200  | -2.83534500 |
| C  | 3.05744600  | 2.51147200  | -1.85347300 |
| H  | -0.86509100 | -3.35100500 | -0.00311600 |
| H  | 0.79297200  | -4.70016200 | -0.54774800 |
| C  | -1.13949700 | -1.98975600 | -0.33982100 |
| H  | 4.51607400  | 1.65297700  | 3.03741800  |
| H  | 2.79431200  | 1.92057900  | 2.74376900  |
| P  | -2.54108100 | -0.96714100 | 0.09750100  |
| Cl | -4.26999100 | 2.26718700  | 0.16885900  |
| C  | -0.84329600 | 2.60140300  | 1.32761300  |
| H  | -3.46996200 | -0.28885900 | -2.66577200 |
| H  | -1.63816200 | 2.63224900  | 2.05898400  |
| C  | -0.32178700 | 3.73107500  | 0.61183400  |
| H  | 1.46375600  | 3.97153100  | -0.64627100 |
| H  | 5.22251600  | 3.28095800  | 1.31121300  |
| H  | 3.54774200  | 3.68993500  | 0.93477000  |
| H  | 4.65322600  | 3.18951900  | -0.35138400 |
| H  | 4.36867800  | -0.24505500 | -2.18840300 |
| H  | 4.59595700  | 1.13524900  | -3.27078700 |
| H  | 5.17586300  | 1.20747400  | -1.60984600 |
| H  | 0.94104300  | 1.39405300  | -2.57510600 |
| H  | 2.17286400  | 1.34819200  | -3.83490000 |
| H  | 1.84521400  | -0.09968400 | -2.88726200 |
| H  | -1.46375100 | -3.97153300 | 0.64626800  |
| C  | -3.97242000 | -1.55782500 | -0.94748900 |
| C  | -3.00330600 | -1.41862800 | 1.84436600  |
| C  | -3.66329000 | -1.33755500 | -2.43245700 |
| H  | -0.79297800 | 4.70016200  | 0.54772100  |
| C  | -4.36723900 | -0.10354500 | -0.68550400 |
| H  | -4.79683000 | -0.89712500 | -0.66419800 |
| C  | -4.36693500 | -0.84381400 | 2.24305800  |
| C  | -1.91905800 | -0.98800600 | 2.83533800  |
| H  | -3.05739100 | -2.51146100 | 1.85350600  |
| H  | -4.51612600 | -1.65300600 | -3.03736700 |
| H  | -2.79436000 | -1.92061200 | -2.74374300 |
| H  | -5.22255000 | -3.28098000 | -1.31113200 |
| H  | -3.54777400 | -3.68994200 | -0.93470500 |
| H  | -4.65323800 | -3.18950000 | 0.35145600  |
| H  | -4.36864900 | 0.24505200  | 2.18844500  |
| H  | -4.59589200 | -1.13525200 | 3.27083700  |
| H  | -5.17582800 | -1.20748900 | 1.60990700  |
| H  | -0.94098400 | -1.39400700 | 2.57507800  |
| H  | -2.17277500 | -1.34815000 | 3.83490300  |
| H  | -1.84516600 | 0.09972100  | 2.88724100  |

optimized geometry of

**1a-monomer**

|    |             |             |             |
|----|-------------|-------------|-------------|
| Sn | 2.07666000  | 0.55912600  | 0.14557700  |
| Cl | 3.84273600  | -0.40327700 | -1.25550300 |
| C  | 1.26154000  | -1.61101500 | 1.07353300  |
| H  | 0.57944200  | -1.77064600 | -1.06784800 |
| H  | 2.08504400  | -2.32425500 | 1.11510000  |
| C  | 0.68771400  | -0.90179400 | 2.17269800  |
| C  | 0.46596800  | -1.31349400 | -0.08397200 |
| C  | -0.44744400 | -0.20387000 | 1.71042300  |
| H  | 1.06431400  | -0.90932000 | 3.19618800  |
| C  | -0.60873900 | -0.44375100 | 0.32100300  |
| P  | -1.91402600 | 0.11432900  | -0.84945000 |
| H  | -2.33187700 | -2.44912200 | -2.21299500 |
| H  | -1.07333800 | 0.44787700  | 2.31858400  |
| C  | -3.20556400 | -1.25607000 | -0.58505600 |
| C  | -2.67078800 | 1.56927000  | 0.08642600  |
| C  | -2.67838100 | -2.57183600 | -1.17424000 |
| C  | -3.69876200 | -1.44897800 | 0.85129300  |
| H  | -4.05077300 | -0.92090700 | -1.21283100 |
| C  | -4.01299800 | 1.96406000  | -0.54583100 |
| C  | -1.69785200 | 2.75647500  | 0.08662300  |
| H  | -2.85386800 | 1.26583300  | 1.13093600  |
| H  | -3.47014800 | -3.33968300 | -1.16931000 |
| H  | -1.83634100 | -2.96335900 | -0.57992700 |
| H  | -4.44213500 | -2.26362700 | 0.89563500  |
| H  | -2.86712600 | -1.71982100 | 1.52169700  |
| H  | -4.18019700 | -0.54602600 | 1.25700600  |
| H  | -3.89396800 | 2.20982600  | -1.61481900 |
| H  | -4.42370700 | 2.85661400  | -0.04458700 |
| H  | -4.76768200 | 1.16679000  | -0.46506200 |
| H  | -0.74558900 | 2.51010500  | 0.58023900  |
| H  | -2.13784100 | 3.61460300  | 0.62254700  |
| H  | -1.47147200 | 3.08561300  | -0.94150400 |

optimized geometry of

**1a-Cl-bridged dimer**

|    |             |             |              |
|----|-------------|-------------|--------------|
| Sn | -1.95714200 | 0.67955900  | 0.22294900   |
| Cl | 0.35499900  | 0.39982300  | 1.69288500   |
| C  | -2.73488500 | -1.49808900 | 0.97673400   |
| H  | -3.50499200 | -1.76027700 | -1.122260100 |
| H  | -1.89827500 | -2.19495300 | 1.02229800   |
| C  | -3.27008000 | -0.74261400 | 2.07431400   |
| C  | -3.61716300 | -1.30198200 | -0.13955500  |
| C  | -4.44937000 | -0.10681500 | 1.63108100   |
| H  | -2.83889200 | -0.68876500 | 3.07422800   |
| C  | -4.67914600 | -0.44387000 | 0.26521900   |
| P  | -6.04752900 | 0.02800400  | -0.86840800  |
| H  | -6.55463300 | -2.62198400 | -2.02742700  |
| H  | -5.06547400 | 0.55932700  | 2.23402800   |
| C  | -7.32246200 | -1.31521400 | -0.43501100  |
| C  | -6.76248300 | 1.54757000  | -0.00268300  |
| C  | -6.82672500 | -2.66940300 | -0.96067400  |
| C  | -7.72998300 | -1.40733900 | -1.03788000  |
| H  | -8.20431300 | -1.02410700 | -0.10367000  |
| C  | -8.14016700 | 1.89140400  | -0.58644200  |
| C  | -5.80017600 | 2.73486200  | -0.14337200  |
| H  | -6.88605600 | 1.32252700  | 1.07011700   |
| H  | -7.60880400 | -3.43848100 | -0.84351100  |
| H  | -5.94057700 | -3.01107600 | -0.40047800  |
| H  | -8.47033600 | -2.21320100 | 1.18276400   |
| H  | -6.86013300 | -1.63629500 | 1.67464400   |
| H  | -8.18515600 | -0.47615600 | 1.40890600   |
| H  | -8.08236400 | 2.05449200  | -1.67616800  |
| H  | -8.52753500 | 2.81926700  | -0.13274000  |
| H  | -8.88455000 | 1.10155100  | -0.40284700  |
| H  | -4.82145200 | 2.52896400  | 0.31574700   |
| H  | -6.21684500 | 3.62957300  | 0.34988700   |
| H  | -5.63024300 | 2.98610800  | -1.20381500  |
| P  | 6.04752300  | -0.02800700 | 0.86840500   |
| H  | 6.55462500  | 2.62198700  | 2.02741300   |
| H  | 3.50499200  | 1.76028200  | 1.12260500   |
| C  | 4.67914000  | 0.44387500  | -0.26522000  |
| C  | 7.32246000  | 1.31520700  | 0.43500700   |
| C  | 6.76247000  | -1.54757300 | 0.00267400   |
| C  | 6.82672200  | 2.66939900  | 0.96066100   |
| Sn | 1.95715000  | -0.67955600 | -0.22294500  |
| C  | 3.61716100  | 1.30199000  | 0.13955800   |
| C  | 4.44936200  | 0.10682400  | -1.63108200  |
| C  | 7.72999000  | 1.40732300  | -1.03788200  |
| H  | 8.20430700  | 1.02410100  | 1.03367300   |
| C  | 8.14016400  | -1.89139900 | 0.58641500   |
| H  | 5.80016900  | -2.73486800 | 0.14338100   |
| H  | 6.88602700  | -1.32253300 | -1.07012700  |
| H  | 7.60880300  | 3.43847600  | 0.84349700   |
| H  | 5.94057800  | 3.01107000  | 0.40045800   |
| Cl | -0.35499500 | -0.39983100 | -1.69287800  |
| C  | 2.73487900  | 1.49809600  | -0.97672700  |
| H  | 1.89826600  | 2.19495700  | -1.02228700  |
| C  | 3.27007200  | 0.74262500  | -2.07431100  |
| H  | 5.06546300  | -0.55931800 | -2.23403100  |
| H  | 8.47034500  | 2.21318300  | -1.18276600  |
| H  | 6.86014300  | 1.63627700  | -1.67465100  |
| H  | 8.18516300  | 0.47613700  | -1.40889900  |
| H  | 8.08237600  | -2.05448400 | 1.67614300   |
| H  | 8.52752900  | -2.81926200 | 0.13271100   |
| H  | 8.88454000  | -1.10154400 | 0.40280800   |
| H  | 4.82143800  | -2.52897600 | -0.31572500  |
| H  | 6.21683400  | -3.62957900 | -0.34988000  |
| H  | 5.63025100  | -2.98611200 | 1.20382700   |
| H  | 2.83888100  | 0.68877800  | -3.07422400  |

## 6. References

- [1] I. Krossing, *Chem. Eur. J.* 2001, **7**, 490–502.
- [2] C. Müller, J. Warken, V. Huch, B. Morgenstern, I.-A. Bischoff, M. Zimmer and A. Schäfer, *Chem. Eur. J.* 2021, **27**, 6500–6510.
- [3] G. R. Fulmer, A. J. M. Miller, N. H. Sherden, H. E. Gottlieb, A. Nudelman, B. M. Stoltz, J. E. Bercaw, K. I. Goldberg, *Organometallics* 2010, **29**, 2176–2179
- [4] a) G. M. Sheldrick, *Acta Cryst.*, 2008, **A64**, 112–122; b) G. M. Sheldrick, *Acta Cryst.*, 2015, **A71**, 3–8; c) C. B. Hübschle, G. M. Sheldrick, B. Dittrich, *J. Appl. Crystallogr.*, 2011, **44**, 1281–1284.
- [5] M. J. Frisch, G. W. Trucks, H. B. Schlegel, G. E. Scuseria, M. A. Robb, J. R. Cheeseman, G. Scalmani, V. Barone, G. A. Petersson, H. Nakatsuji, X. Li, M. Caricato, A. V. Marenich, J. Bloino, B. G. Janesko, R. Gomperts, B. Mennucci, H. P. Hratchian, J. V. Ortiz, A. F. Izmaylov, J. L. Sonnenberg, D. Williams-Young, F. Ding, F. Lipparini, F. Egidi, J. Goings, B. Peng, A. Petrone, T. Henderson, D. Ranasinghe, V. G. Zakrzewski, J. Gao, N. Rega, G. Zheng, W. Liang, M. Hada, M. Ehara, K. Toyota, R. Fukuda, J. Hasegawa, M. Ishida, T. Nakajima, Y. Honda, O. Kitao, H. Nakai, T. Vreven, K. Throssell, J. A. Montgomery, Jr., J. E. Peralta, F. Ogliaro, M. J. Bearpark, J. J. Heyd, E. N. Brothers, K. N. Kudin, V. N. Staroverov, T. A. Keith, R. Kobayashi, J. Normand, K. Raghavachari, A. P. Rendell, J. C. Burant, S. S. Iyengar, J. Tomasi, M. Cossi, J. M. Millam, M. Klene, C. Adamo, R. Cammi, J. W. Ochterski, R. L. Martin, K. Morokuma, O. Farkas, J. B. Foresman and D. J. Fox, Gaussian, Inc., Wallingford CT, 2019.
- [6] a) A. D. Becke, *J. Chem. Phys.*, 1993, **98**, 5648–5652; b) A. Schaefer, H. Horn and R. Ahlrichs, *J. Chem. Phys.*, 1992, **97**, 2571–2577; c) A. Schaefer, C. Huber, and R. Ahlrichs, *J. Chem. Phys.*, 1994, **100**, 5829–5835.
